# Supplementary material for: Functional DNA methylation differences between tissues, cell types, and across individuals discovered using the M&M algorithm
Source: HighWire-hosted journal article supplement (doi:10.1101/gr.156539.113), 2013-06-26

A

Correlation: MeDIP-seq reads Vs. methylated CpG sites  
(Coefficient: 1.320, Correlation score:0.6318363)

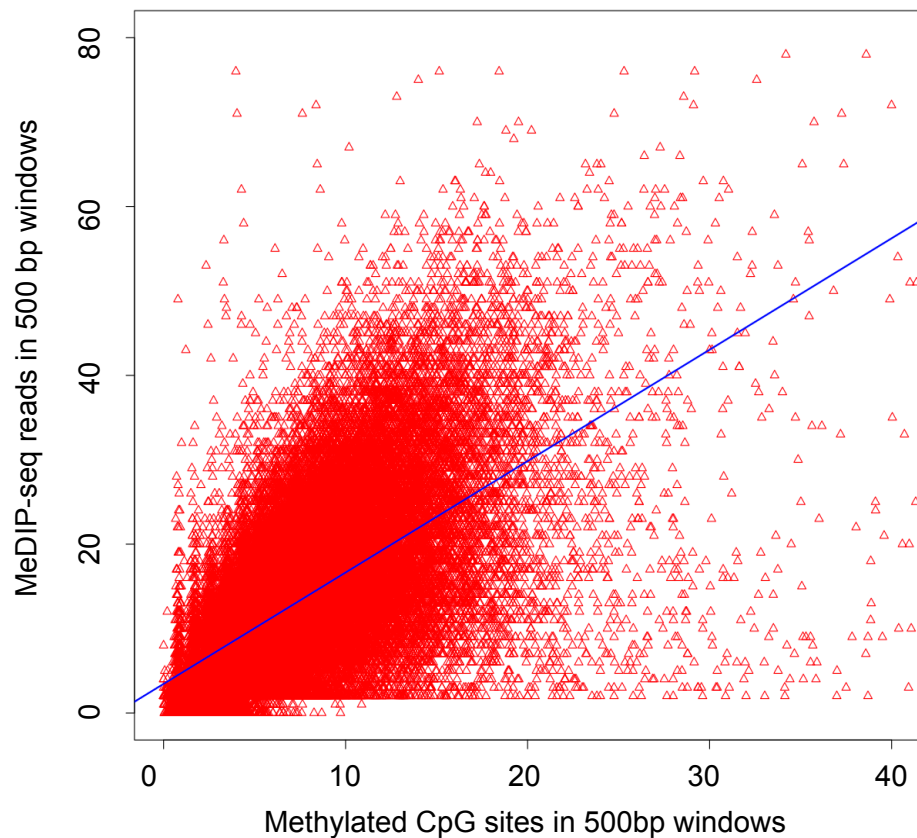

B

Correlation: MRE-seq reads Vs. un-methylated CpG sites  
(Coefficient: 2.788, Correlation score:0.5598464 )

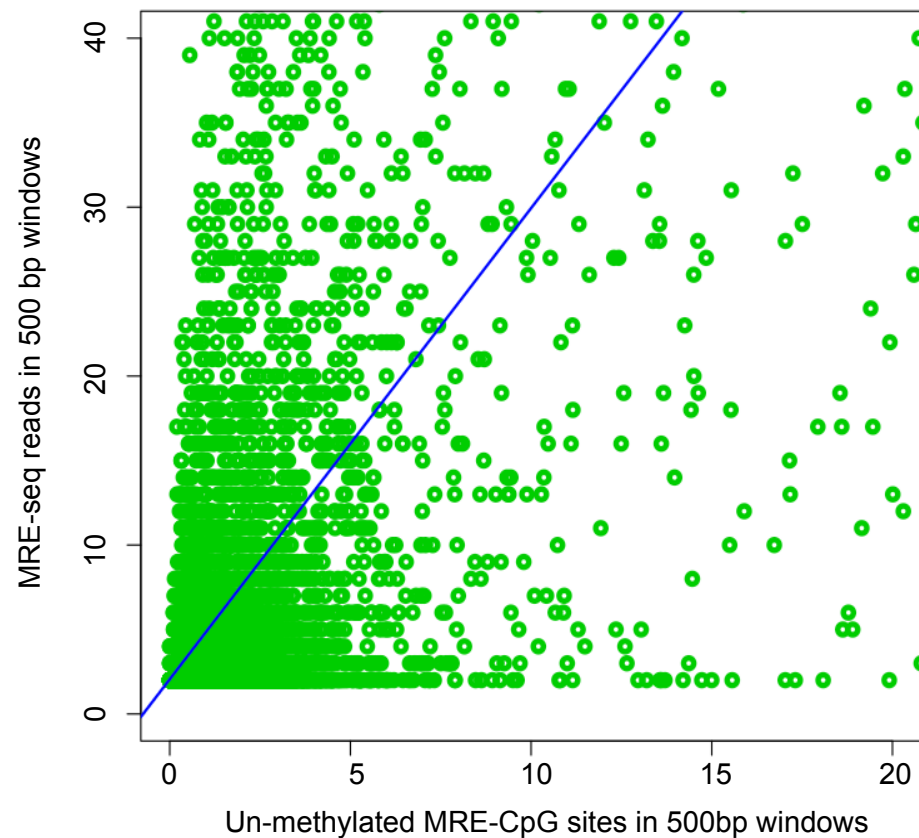

Supplement: Supp_FigS1.pdf [file Supp_FigS1.pdf]
