# Supplementary material for: Functional DNA methylation differences between tissues, cell types, and across individuals discovered using the M&M algorithm
Source: HighWire-hosted journal article supplement (doi:10.1101/gr.156539.113), 2013-06-26
Supplement: Supp_Table_Individual-specific_DMRs.xlsx [file Supp_Table_Individual-specific_DMRs.xlsx]

## Sheet: between blood donors
Chromosome	Start	End
chr1	1043500	1044500
chr1	1186000	1186500
chr1	4204500	4205000
chr1	8389500	8390000
chr1	19110500	19111000
chr1	24538500	24539000
chr1	27440500	27441000
chr1	30028000	30028500
chr1	32129000	32129500
chr1	71172000	71172500
chr1	110254500	110255000
chr1	115397500	115398000
chr1	145382000	145382500
chr1	150897500	150898000
chr1	157248500	157249500
chr1	161368500	161369000
chr1	161391500	161392000
chr1	172419500	172420000
chr1	201618000	201618500
chr1	201619000	201619500
chr1	205030500	205031000
chr1	234367000	234367500
chr1	248855000	248855500
chr10	1451500	1452000
chr10	2543500	2544000
chr10	42645000	42645500
chr10	71094500	71095000
chr10	82296000	82296500
chr10	85974000	85974500
chr10	101825000	101825500
chr10	104629500	104630000
chr10	105420500	105421000
chr10	123355000	123355500
chr10	130726500	130727000
chr10	133890500	133891000
chr10	134241500	134242000
chr10	134726500	134727500
chr10	134991500	134992000
chr10	135153000	135153500
chr11	223000	223500
chr11	1016500	1017500
chr11	1432000	1432500
chr11	1580000	1580500
chr11	6292000	6292500
chr11	17569000	17569500
chr11	45671500	45672000
chr11	63729000	63729500
chr11	63801500	63802000
chr11	67137500	67138000
chr11	68417500	68418000
chr11	68817000	68817500
chr11	69686500	69687000
chr11	75690500	75691000
chr11	82114500	82115000
chr12	83000	83500
chr12	739500	740500
chr12	2365000	2365500
chr12	3123500	3124000
chr12	6729500	6730000
chr12	11241500	11242500
chr12	110074000	110074500
chr12	124873500	124874000
chr12	126162500	126163000
chr12	131880000	131880500
chr12	132293000	132294000
chr13	20695000	20695500
chr13	41063000	41063500
chr13	79234000	79234500
chr13	88329000	88329500
chr13	100129000	100129500
chr13	100218500	100219000
chr13	103507000	103507500
chr13	110384000	110384500
chr13	112332500	112333000
chr13	113634500	113635000
chr13	114617000	114617500
chr13	114882000	114882500
chr14	100771000	100771500
chr14	102050500	102051000
chr14	102990000	102990500
chr14	106102000	106102500
chr14	106539500	106540500
chr15	26874000	26874500
chr15	39872000	39872500
chr15	67145500	67146000
chr15	91381500	91382000
chr16	830500	831000
chr16	867000	867500
chr16	23327500	23328000
chr16	34808500	34809000
chr16	53407500	53408000
chr16	55866500	55867000
chr16	57335000	57335500
chr16	58824000	58824500
chr16	75547500	75548000
chr16	75574000	75575000
chr16	75577000	75577500
chr16	75578500	75579000
chr16	81207000	81207500
chr16	87524500	87525000
chr16	88364500	88365000
chr16	90148500	90149000
chr17	65000	65500
chr17	485500	486000
chr17	6558500	6559000
chr17	7254000	7254500
chr17	14201500	14202000
chr17	30815000	30815500
chr17	30817000	30817500
chr17	36997000	36997500
chr17	72916000	72916500
chr17	75412000	75412500
chr17	79052000	79052500
chr17	80436000	80436500
chr17	80942000	80942500
chr18	73350500	73351000
chr18	74499500	74500000
chr18	76073500	76074000
chr19	888500	889000
chr19	2034500	2035000
chr19	2567500	2568000
chr19	3210500	3211000
chr19	3290000	3290500
chr19	5205500	5206000
chr19	7107000	7107500
chr19	10946000	10946500
chr19	12984000	12984500
chr19	17487500	17488000
chr19	17600500	17601000
chr19	21265000	21265500
chr19	21666000	21666500
chr19	29379000	29379500
chr19	48565000	48565500
chr19	49520500	49521000
chr19	50962000	50962500
chr19	51017500	51018000
chr19	51505500	51506000
chr19	55831000	55831500
chr19	58521500	58522000
chr2	393500	394000
chr2	2577500	2578000
chr2	2940500	2941000
chr2	3675000	3675500
chr2	45537500	45538000
chr2	53110000	53110500
chr2	74357500	74358000
chr2	88302500	88303000
chr2	118617500	118618000
chr2	179387500	179388500
chr2	218854500	218855000
chr2	220108000	220108500
chr2	230428000	230428500
chr2	232539500	232540000
chr2	232580000	232580500
chr2	238990500	238991000
chr2	239037000	239037500
chr2	240673500	240674000
chr2	242140500	242141000
chr2	242763500	242764000
chr20	3732500	3733000
chr20	11360000	11360500
chr20	29611000	29611500
chr20	29612000	29612500
chr20	43933000	43933500
chr20	46793000	46793500
chr20	60436000	60436500
chr20	60853500	60854000
chr20	61816500	61817500
chr21	28212500	28213000
chr21	30396000	30396500
chr21	30449000	30450000
chr21	44158500	44159000
chr21	44466500	44467000
chr21	45198500	45199000
chr21	45560500	45561000
chr21	46800000	46800500
chr21	47560000	47560500
chr21	47581000	47582000
chr22	20230000	20230500
chr22	20256000	20256500
chr22	23920000	23920500
chr22	25883000	25883500
chr22	31523000	31523500
chr22	35929500	35930000
chr22	42525000	42526000
chr22	45631000	45631500
chr22	48657000	48657500
chr22	49765000	49765500
chr22	49875500	49876000
chr22	50458500	50459000
chr22	50460500	50461000
chr22	50500000	50500500
chr22	50616000	50616500
chr22	50672500	50673000
chr3	12829000	12829500
chr3	49756000	49756500
chr3	53037000	53037500
chr3	105601500	105602000
chr3	107039000	107039500
chr3	128165000	128165500
chr3	133502500	133503000
chr3	138724500	138725000
chr3	138763000	138764000
chr3	191781500	191782000
chr3	195507000	195507500
chr3	197895500	197896500
chr4	54000	54500
chr4	582000	582500
chr4	640000	640500
chr4	1516000	1516500
chr4	3374500	3375000
chr4	25429500	25430000
chr4	60384000	60384500
chr4	113007500	113008000
chr4	155702500	155703000
chr4	183734000	183734500
chr4	190285000	190285500
chr5	346500	347000
chr5	6773500	6774000
chr5	8457500	8458000
chr5	57777500	57778000
chr5	77142500	77143000
chr5	140263500	140264000
chr5	150226000	150226500
chr5	157117500	157118000
chr5	167957000	167957500
chr6	292000	293500
chr6	10660000	10660500
chr6	10720000	10721000
chr6	18020000	18020500
chr6	27706000	27706500
chr6	28601000	28601500
chr6	29723000	29723500
chr6	31148500	31149000
chr6	34482000	34482500
chr6	37503500	37504000
chr6	74104500	74105000
chr6	110721000	110721500
chr6	116886000	116886500
chr6	158014000	158014500
chr6	166207500	166208000
chr6	169633500	169634000
chr7	1094500	1095000
chr7	2099500	2100000
chr7	23246000	23246500
chr7	32358000	32358500
chr7	44104500	44105000
chr7	44184500	44185000
chr7	55235000	55235500
chr7	56606000	56606500
chr7	62528500	62529000
chr7	64338000	64338500
chr7	65565000	65565500
chr7	98029000	98029500
chr7	101726500	101727000
chr7	140135000	140135500
chr7	140225500	140226000
chr7	149484500	149485000
chr7	156741500	156742000
chr7	158233500	158234000
chr7	158574500	158575000
chr7	158751000	158751500
chr7	158766000	158766500
chr8	453500	454000
chr8	989500	990500
chr8	48664500	48665000
chr8	61325500	61326000
chr8	112295000	112295500
chr8	134083500	134084000
chr8	141108500	141109000
chr8	142262500	142263000
chr8	143645000	143645500
chr8	144636000	144636500
chr8	145003000	145003500
chr8	145654500	145655000
chr9	4901500	4902000
chr9	31211000	31211500
chr9	34371000	34371500
chr9	93880000	93880500
chr9	99449500	99450000
chr9	123605500	123606000
chr9	126128500	126129000
chr9	128172500	128173000
chr9	136625500	136626000
chr9	138728500	138729000
chr9	139495500	139496000
chr9	139996500	139997500
chr9	140311000	140311500
chr9	140395000	140395500

## Sheet: between breast donors
Chromosome	Start	End
chr1	3034500	3035000
chr1	24538500	24539000
chr10	125650000	125650500
chr10	135341000	135342500
chr11	2924500	2925000
chr11	3228000	3228500
chr11	60884000	60884500
chr11	131940500	131941000
chr12	131068500	131069000
chr12	132293500	132294000
chr15	30337000	30337500
chr16	217000	217500
chr16	909000	909500
chr16	55794500	55795000
chr16	55866500	55867000
chr17	194000	194500
chr17	77665000	77665500
chr17	79498500	79499000
chr18	77234500	77235500
chr19	7107000	7107500
chr19	14584000	14585000
chr19	21265000	21265500
chr19	54905000	54905500
chr19	58549000	58549500
chr19	58867500	58869000
chr2	25384000	25384500
chr2	39470500	39471500
chr2	95537500	95538000
chr2	230429000	230429500
chr21	47604500	47605000
chr21	48070500	48071000
chr4	1731500	1732000
chr4	186748500	186749000
chr5	649000	650000
chr5	57777500	57778000
chr6	170452000	170452500
chr7	628000	628500
chr7	808000	808500
chr7	37887000	37887500
chr7	158709500	158710000
chr8	989500	990500
chr8	2585500	2586000
chr8	144788500	144789000
chr8	145164500	145165000
chr9	138384500	138385000
chr9	139997000	139997500

## Sheet: between brain donors
Chromosome	Start	End
chr1	960000	960500
chr1	1490000	1490500
chr1	1848000	1848500
chr1	3384000	3385000
chr1	3433500	3434000
chr1	3473500	3474000
chr1	4749000	4750000
chr1	5298500	5299000
chr1	7693500	7694000
chr1	10883000	10883500
chr1	11410500	11411000
chr1	17295500	17296000
chr1	19184500	19185000
chr1	61520000	61520500
chr1	61554000	61554500
chr1	68038000	68038500
chr1	100233000	100233500
chr1	170634500	170636000
chr1	170636500	170637000
chr1	180919500	180920000
chr1	204937000	204937500
chr1	214157000	214157500
chr1	244868500	244869000
chr10	3329500	3330000
chr10	45647000	45647500
chr10	49673500	49674000
chr10	72450500	72451000
chr10	98923000	98923500
chr10	123353000	123353500
chr10	123858500	123859000
chr10	126067500	126068000
chr10	130124500	130125000
chr10	131819000	131819500
chr11	658000	659000
chr11	1221000	1221500
chr11	2571000	2572000
chr11	44419500	44420000
chr11	57792000	57792500
chr11	63676000	63676500
chr11	63918000	63918500
chr11	67186000	67186500
chr11	78534000	78534500
chr11	116303000	116303500
chr11	121665000	121666000
chr11	133895000	133895500
chr11	134368500	134369000
chr11	134630000	134630500
chr12	101110000	101110500
chr12	108757000	108757500
chr12	109192500	109193000
chr12	119617000	119617500
chr12	121716500	121717000
chr12	124844000	124844500
chr12	124865000	124865500
chr13	31417500	31418000
chr13	95131000	95131500
chr13	100627000	100628500
chr13	100640000	100640500
chr13	100641000	100642000
chr13	107121500	107122000
chr14	93419000	93419500
chr14	95356500	95357000
chr14	97878000	97878500
chr14	100014500	100015000
chr14	102369500	102370000
chr14	103467500	103468000
chr14	104012500	104013000
chr14	104015500	104016000
chr14	104644500	104645000
chr14	105046000	105046500
chr14	105935500	105936000
chr15	74570500	74571000
chr15	96886500	96888000
chr15	96895500	96896000
chr15	101604000	101604500
chr15	102150500	102151000
chr16	1139500	1140000
chr16	2742000	2742500
chr16	3026500	3027000
chr16	19702500	19703000
chr16	50745500	50746000
chr16	69516000	69516500
chr16	88364500	88365000
chr17	208500	209000
chr17	925500	926000
chr17	1094000	1094500
chr17	2267500	2268000
chr17	3880000	3880500
chr17	4377500	4378000
chr17	17083500	17084000
chr17	18893500	18894000
chr17	27905000	27905500
chr17	38708500	38709000
chr17	39019500	39020000
chr17	40934500	40935000
chr17	40936000	40937000
chr17	76170500	76171000
chr17	76994500	76995000
chr17	77415500	77416000
chr17	78004500	78005000
chr17	79102500	79103000
chr17	79701500	79702000
chr17	79966500	79967500
chr18	12449500	12450000
chr18	72879500	72880000
chr18	77336000	77336500
chr19	1170000	1170500
chr19	1873500	1874000
chr19	4371500	4372000
chr19	4449000	4449500
chr19	4914500	4915000
chr19	5250000	5250500
chr19	9959500	9960000
chr19	9962500	9963000
chr19	13108000	13108500
chr19	13110500	13111000
chr19	13112000	13112500
chr19	13121000	13121500
chr19	13123000	13124000
chr19	13142000	13142500
chr19	13147000	13147500
chr19	13151000	13151500
chr19	13181000	13182000
chr19	13206000	13206500
chr19	13207000	13207500
chr19	15550000	15550500
chr19	18783000	18783500
chr19	19625500	19626000
chr19	30555500	30556000
chr19	35753000	35753500
chr19	38039500	38040000
chr19	39210000	39210500
chr19	51073000	51073500
chr19	51411500	51412000
chr2	2577500	2578000
chr2	2705000	2705500
chr2	3675000	3675500
chr2	10024000	10024500
chr2	11123500	11124000
chr2	97553000	97553500
chr2	128333500	128334000
chr2	129057000	129057500
chr2	129697500	129698000
chr2	149478000	149478500
chr2	160084500	160085000
chr2	234847500	234848000
chr2	240901000	240901500
chr2	241536000	241536500
chr2	242509000	242509500
chr2	242812500	242813000
chr20	31210500	31211000
chr20	35050000	35050500
chr20	56689000	56689500
chr20	57728000	57728500
chr20	61973500	61974500
chr20	62200500	62201000
chr21	16192000	16192500
chr21	44774000	44774500
chr21	45601000	45601500
chr21	46878000	46878500
chr21	48044000	48044500
chr22	39829500	39830000
chr22	39988500	39989000
chr22	42784000	42784500
chr22	43817000	43817500
chr22	46475500	46476000
chr22	46929500	46930000
chr22	46931000	46932000
chr22	47947000	47947500
chr22	50148000	50148500
chr22	50459500	50460000
chr22	50466000	50466500
chr3	10968000	10968500
chr3	48510000	48510500
chr3	50230500	50231000
chr3	50428000	50428500
chr3	126739500	126740000
chr3	138763000	138763500
chr3	147076500	147077500
chr3	147095500	147096000
chr3	147107500	147108000
chr3	147108500	147109500
chr3	147113500	147114000
chr3	147123000	147124500
chr3	147138000	147138500
chr4	1604000	1604500
chr4	1799000	1799500
chr4	1800000	1802500
chr4	1803000	1806500
chr4	1807000	1807500
chr4	1808000	1809000
chr4	7287500	7288000
chr4	7344000	7344500
chr4	8912500	8913000
chr4	9760000	9760500
chr4	13945500	13946000
chr4	24818500	24819000
chr4	26275000	26275500
chr5	5352500	5353000
chr5	7889000	7889500
chr5	42924000	42924500
chr5	92906000	92907500
chr5	92914000	92914500
chr5	92923000	92924000
chr5	92929000	92930000
chr5	140719000	140719500
chr5	140725000	140725500
chr5	140730500	140731000
chr5	140736500	140737000
chr5	140740000	140740500
chr5	140744000	140746000
chr5	140751000	140752000
chr5	140755000	140755500
chr5	140764500	140765000
chr5	174036000	174036500
chr5	179340000	179340500
chr6	28446500	28447000
chr6	30419500	30420000
chr6	34051000	34051500
chr6	43791000	43791500
chr6	107990000	107990500
chr6	108496500	108497500
chr6	138753000	138753500
chr6	169633500	169634000
chr7	617500	618000
chr7	1122500	1123000
chr7	1140500	1141000
chr7	2543000	2543500
chr7	55235000	55235500
chr7	75934000	75934500
chr7	100464000	100464500
chr7	121955500	121956500
chr7	155348000	155348500
chr7	155724000	155724500
chr7	157577500	157578000
chr7	158293500	158294000
chr8	990000	990500
chr8	1403500	1404500
chr8	2174000	2174500
chr8	21672000	21672500
chr8	23299000	23299500
chr8	61834500	61835000
chr8	140834500	140835000
chr8	140969500	140970000
chr8	143379500	143380000
chr8	144683500	144684000
chr8	144872500	144873000
chr8	144889500	144890000
chr9	34371500	34372000
chr9	72027000	72027500
chr9	91321500	91322000
chr9	98811500	98812000
chr9	124029000	124029500
chr9	130717000	130717500
chr9	134371000	134371500
chr9	134455500	134456000
chr9	136319000	136319500
chr9	136654500	136655000
chr9	138097000	138097500
chr9	138728500	138729000
chr9	138730000	138730500
chr9	139394500	139395000
chr9	140674500	140675000
