# Supplementary material for: Functional DNA methylation differences between tissues, cell types, and across individuals discovered using the M&M algorithm
Source: HighWire-hosted journal article supplement (doi:10.1101/gr.156539.113), 2013-06-26
Supplement: Supp_Table_S-Tissue-specific_DRMs_.xlsx [file Supp_Table_S-Tissue-specific_DRMs_.xlsx]

## Sheet: H1 specific DMR
Chromosome	Start	End	Hyper(+1)/Hypo(-1)
chr1	845500	846000	1
chr1	856000	856500	1
chr1	1143500	1144000	1
chr1	2162500	2163500	1
chr1	2222000	2222500	1
chr1	2487500	2488000	1
chr1	2703000	2703500	1
chr1	2706000	2706500	1
chr1	2945000	2945500	1
chr1	3087000	3088000	1
chr1	5831000	5831500	1
chr1	8014000	8014500	1
chr1	17023000	17023500	1
chr1	29101500	29102000	1
chr1	32892500	32893000	1
chr1	37945000	37945500	1
chr1	43250500	43251500	1
chr1	59042000	59042500	1
chr1	62662000	62662500	-1
chr1	71512500	71513000	1
chr1	75591000	75591500	1
chr1	109204000	109204500	1
chr1	149138000	149138500	1
chr1	149146000	149147000	1
chr1	149155500	149156500	1
chr1	149194000	149194500	1
chr1	149230500	149231000	1
chr1	152161500	152162000	1
chr1	152488000	152488500	1
chr1	152595500	152596000	1
chr1	156215500	156216000	1
chr1	161442500	161443000	-1
chr1	197892000	197892500	-1
chr1	207818000	207819000	1
chr1	213081500	213082000	-1
chr1	227748500	227749000	1
chr1	229568500	229569000	1
chr1	244979000	244979500	-1
chr1	245419500	245420000	-1
chr1	248020000	248021500	1
chr10	21796000	21796500	-1
chr10	22767000	22767500	-1
chr10	27608500	27609000	1
chr10	29698000	29699000	1
chr10	33808000	33808500	-1
chr10	35896500	35897500	1
chr10	38146000	38147000	1
chr10	38383500	38384000	1
chr10	38691000	38691500	1
chr10	42738000	42738500	1
chr10	42971000	42972000	1
chr10	43332500	43333000	1
chr10	43393000	43394000	1
chr10	48573500	48574000	1
chr10	51784500	51785000	1
chr10	74094500	74095000	1
chr10	76866000	76866500	-1
chr10	77221500	77222000	-1
chr10	81904000	81904500	1
chr10	91597000	91598000	1
chr10	96991000	96992000	-1
chr10	97849500	97850000	1
chr10	102322000	102322500	1
chr10	105344000	105344500	1
chr10	114592000	114592500	-1
chr10	124639000	124639500	1
chr10	135045000	135045500	1
chr10	135333500	135334000	1
chr10	135341500	135343000	1
chr11	279000	282000	1
chr11	569000	569500	1
chr11	796000	796500	1
chr11	2292000	2292500	1
chr11	16010500	16011000	-1
chr11	18727500	18728000	1
chr11	20626000	20627500	1
chr11	34460000	34461000	1
chr11	43902000	43902500	1
chr11	44775000	44775500	-1
chr11	49229500	49230000	1
chr11	63257500	63258000	-1
chr11	64643500	64644000	1
chr11	65153500	65154000	1
chr11	65340500	65341000	1
chr11	66326500	66327000	1
chr11	66335500	66336500	1
chr11	67387500	67388500	-1
chr11	85393500	85394000	1
chr11	111250000	111250500	1
chr11	113929000	113929500	-1
chr11	122430500	122431000	-1
chr11	123947000	123947500	1
chr11	133797500	133798000	1
chr12	2017000	2017500	1
chr12	12939500	12940000	1
chr12	30354000	30354500	1
chr12	34261000	34261500	1
chr12	34371500	34372000	1
chr12	38532000	38532500	1
chr12	42539500	42540000	-1
chr12	53184000	53184500	1
chr12	54609500	54610000	1
chr12	66275500	66276000	1
chr12	66524000	66524500	1
chr12	66563500	66564000	1
chr12	75601500	75602000	1
chr12	94656000	94656500	1
chr12	95943500	95944000	-1
chr12	110059500	110060000	1
chr12	114107500	114108000	1
chr12	117771500	117772000	1
chr12	118557500	118558000	-1
chr12	121087500	121088000	1
chr12	132690000	132690500	1
chr12	133186500	133187500	1
chr13	20438500	20439000	1
chr13	22615000	22615500	-1
chr13	31480000	31480500	1
chr13	58208000	58209000	1
chr13	88328000	88329000	-1
chr13	113655500	113656000	1
chr14	21296000	21296500	-1
chr14	24779500	24780500	1
chr14	32030500	32031000	1
chr14	33401500	33402000	-1
chr14	38080000	38080500	1
chr14	38679000	38679500	1
chr14	51974500	51975000	1
chr14	65007500	65009000	1
chr14	69256000	69257000	1
chr14	74036000	74036500	1
chr14	74816000	74816500	-1
chr14	77600000	77600500	1
chr14	78108000	78108500	1
chr14	93418000	93418500	1
chr14	103570500	103571000	1
chr14	103739500	103740500	1
chr14	105993500	105994000	1
chr14	105995000	105995500	1
chr15	27137000	27137500	1
chr15	29638000	29638500	-1
chr15	29949000	29949500	-1
chr15	34787500	34788500	1
chr15	52404500	52405000	1
chr15	68943000	68943500	-1
chr15	74838500	74839000	1
chr15	74891000	74891500	1
chr15	76444000	76444500	-1
chr15	80211500	80212000	-1
chr15	83776500	83777000	1
chr15	91208500	91209000	1
chr15	91473000	91474000	1
chr15	93254500	93255000	-1
chr15	93277000	93277500	1
chr15	101389500	101390500	1
chr16	1120000	1120500	1
chr16	1311000	1312000	1
chr16	1322000	1322500	1
chr16	1361500	1362000	1
chr16	2083500	2084000	1
chr16	2391500	2392000	1
chr16	2835000	2836000	1
chr16	3210000	3210500	1
chr16	3314500	3315000	1
chr16	3414500	3415500	1
chr16	4620500	4621000	-1
chr16	22959500	22960000	1
chr16	27280000	27280500	1
chr16	27413500	27414000	1
chr16	28634500	28635000	1
chr16	30108000	30109000	-1
chr16	30123500	30124000	-1
chr16	30380000	30381000	1
chr16	53407000	53407500	1
chr16	63651000	63651500	1
chr16	70655000	70655500	-1
chr16	81763000	81763500	-1
chr16	82044500	82045000	1
chr16	83874500	83875000	-1
chr16	85171000	85171500	1
chr16	85650000	85650500	1
chr16	87840000	87840500	1
chr16	88606000	88606500	1
chr16	88987500	88988000	1
chr16	89070500	89071000	1
chr16	90089000	90089500	1
chr17	2907500	2908000	1
chr17	4688500	4689500	1
chr17	4802500	4803500	1
chr17	4981500	4982500	1
chr17	15686000	15686500	1
chr17	17108500	17109500	1
chr17	20773500	20774000	-1
chr17	21454000	21455000	1
chr17	30771000	30771500	1
chr17	32953500	32954000	1
chr17	36560500	36561000	-1
chr17	40934000	40934500	1
chr17	55123500	55124000	1
chr17	55888000	55888500	1
chr17	60216000	60216500	1
chr17	74132500	74133000	-1
chr17	75450500	75451000	1
chr17	77790000	77790500	-1
chr17	78801500	78802000	-1
chr17	80256000	80256500	1
chr18	3554000	3554500	-1
chr18	11850000	11850500	1
chr18	13136500	13137500	1
chr18	14747500	14748000	1
chr18	15197500	15198000	1
chr18	21978500	21979000	-1
chr18	29304000	29304500	1
chr18	32847000	32847500	1
chr18	34855000	34855500	1
chr18	45058000	45058500	1
chr18	70209000	70210000	1
chr18	70210500	70211000	1
chr18	74608500	74609000	1
chr19	588500	589000	1
chr19	611000	611500	1
chr19	695000	695500	1
chr19	850500	851000	1
chr19	1207500	1208000	1
chr19	1252500	1253500	1
chr19	1325000	1325500	1
chr19	2252000	2252500	1
chr19	3699000	3699500	1
chr19	4911500	4912500	1
chr19	5892000	5892500	1
chr19	9473500	9474000	1
chr19	9517500	9518000	1
chr19	9785000	9786000	1
chr19	11617000	11617500	1
chr19	11878500	11879000	1
chr19	11959500	11960000	1
chr19	12305500	12306500	1
chr19	12624000	12625000	1
chr19	14074500	14075000	-1
chr19	15619000	15619500	1
chr19	15740000	15740500	1
chr19	15833500	15834000	1
chr19	15947000	15948000	1
chr19	16010500	16011000	1
chr19	17983000	17984000	1
chr19	22235000	22236000	1
chr19	22398000	22398500	1
chr19	22469000	22470000	1
chr19	22604500	22605000	1
chr19	22610500	22611500	1
chr19	22715000	22716000	1
chr19	22806000	22806500	1
chr19	22816500	22817500	1
chr19	22966500	22967500	1
chr19	22990000	22990500	1
chr19	23015000	23015500	1
chr19	23185500	23186500	1
chr19	23253000	23254500	1
chr19	23386500	23387000	1
chr19	23653500	23654500	1
chr19	24097500	24098000	1
chr19	24154500	24155000	1
chr19	31911000	31911500	-1
chr19	35068500	35069000	1
chr19	35615000	35616000	1
chr19	35758000	35758500	1
chr19	36276000	36276500	-1
chr19	36748500	36749000	1
chr19	37498500	37499000	1
chr19	37742500	37743000	1
chr19	38042000	38043000	1
chr19	39055500	39056000	1
chr19	40972000	40973000	1
chr19	44324500	44325000	1
chr19	45656000	45656500	1
chr19	48613500	48614000	1
chr19	48947000	48948000	1
chr19	48983500	48984000	1
chr19	50860500	50862000	1
chr19	52957000	52957500	1
chr19	54058000	54058500	1
chr19	54900000	54900500	1
chr19	55603500	55604000	-1
chr19	57154000	57155000	1
chr19	57172000	57172500	1
chr19	57183000	57183500	1
chr19	57276500	57277000	1
chr19	57617500	57618500	1
chr19	58520500	58521500	1
chr19	58629000	58630000	1
chr2	25149500	25150000	1
chr2	26785000	26786000	1
chr2	43406500	43407000	-1
chr2	44058500	44059500	1
chr2	47748000	47749000	1
chr2	64478000	64478500	-1
chr2	69056500	69057000	1
chr2	74642000	74643500	1
chr2	85536000	85536500	1
chr2	95527000	95527500	1
chr2	95540000	95540500	1
chr2	95664000	95664500	1
chr2	95691500	95692500	1
chr2	96192000	96193000	1
chr2	96348500	96349000	1
chr2	102804000	102804500	1
chr2	122440000	122440500	-1
chr2	131010000	131011000	1
chr2	155555500	155556000	1
chr2	162096000	162096500	-1
chr2	171773500	171774000	-1
chr2	180921500	180922000	-1
chr2	189141000	189141500	-1
chr2	220716500	220717000	1
chr2	225307000	225307500	1
chr2	236970500	236971000	-1
chr2	241612000	241612500	1
chr2	242742500	242744000	1
chr20	3641000	3642000	1
chr20	3792000	3793000	1
chr20	5484500	5485000	1
chr20	17296000	17296500	1
chr20	21001000	21001500	1
chr20	23636000	23636500	1
chr20	25834500	25835000	1
chr20	30063000	30063500	1
chr20	30073500	30074000	1
chr20	30173500	30174000	-1
chr20	31215000	31215500	1
chr20	32307500	32308000	1
chr20	32741500	32742000	-1
chr20	35305000	35306000	-1
chr20	44451500	44452000	1
chr20	44639000	44640000	1
chr20	44640500	44641000	1
chr20	44985500	44986000	1
chr20	56323500	56324000	1
chr20	56949500	56950000	-1
chr20	58179000	58179500	1
chr20	58180000	58181000	1
chr20	61611500	61613000	1
chr20	61641000	61641500	1
chr20	62085500	62086000	1
chr20	62089000	62089500	1
chr20	62259500	62260000	1
chr20	62579000	62579500	1
chr21	33765500	33766000	1
chr21	35567500	35568000	-1
chr21	38592500	38593500	1
chr21	38936000	38936500	1
chr21	44782000	44782500	1
chr21	47792000	47792500	1
chr22	17083000	17084000	1
chr22	17090500	17091000	1
chr22	19710000	19710500	-1
chr22	19879500	19880000	1
chr22	27816500	27817000	1
chr22	38070500	38071500	1
chr22	41763000	41763500	1
chr22	42394500	42395000	1
chr22	43659500	43660000	1
chr22	45473500	45474000	1
chr22	46449000	46451000	1
chr22	48014000	48014500	1
chr22	49023000	49023500	1
chr22	50912000	50912500	1
chr3	11103000	11103500	-1
chr3	25831500	25832000	1
chr3	27759000	27759500	-1
chr3	33488500	33489000	-1
chr3	33489500	33490000	-1
chr3	40518500	40519000	1
chr3	42306000	42307500	1
chr3	42947500	42948000	1
chr3	44727000	44727500	1
chr3	50231500	50232000	1
chr3	50396000	50396500	1
chr3	87138000	87139000	1
chr3	127348500	127349000	1
chr3	128764500	128765000	1
chr3	132003500	132004000	-1
chr3	133465000	133465500	1
chr3	179064500	179065000	1
chr3	181437000	181437500	1
chr3	181438000	181438500	1
chr3	186490500	186491000	1
chr3	194208000	194208500	1
chr4	380000	381000	1
chr4	3043000	3044000	1
chr4	6666000	6666500	1
chr4	9002500	9003000	1
chr4	9154500	9155500	1
chr4	13448000	13448500	-1
chr4	15704500	15705000	1
chr4	56659500	56660000	1
chr4	72897500	72898000	1
chr4	93363000	93363500	-1
chr4	104640500	104641500	1
chr4	140081000	140081500	-1
chr4	144480500	144481000	1
chr4	151970000	151971000	-1
chr4	154409500	154410000	1
chr4	155662000	155662500	-1
chr4	186759500	186760000	-1
chr4	187168000	187168500	-1
chr4	188919000	188919500	-1
chr5	51500	52000	-1
chr5	1514500	1515000	-1
chr5	33938500	33939000	1
chr5	42951000	42952500	1
chr5	68628500	68629000	1
chr5	79553000	79553500	-1
chr5	89771500	89772000	-1
chr5	95047000	95047500	-1
chr5	137225000	137225500	1
chr5	138903000	138903500	-1
chr5	140011500	140013000	1
chr5	140207500	140208000	1
chr5	140604500	140605000	1
chr5	140615500	140616500	1
chr5	140718500	140719000	1
chr5	140723500	140724000	1
chr5	140734500	140735000	1
chr5	140741000	140741500	1
chr5	140743500	140744500	1
chr5	140753500	140754000	1
chr5	140762000	140763000	1
chr5	140772000	140773500	1
chr5	140778000	140778500	1
chr5	140779000	140779500	1
chr5	140782500	140783500	1
chr5	140789500	140790000	1
chr5	140794500	140795000	1
chr5	140800500	140801000	1
chr5	140802000	140803000	1
chr5	140810000	140812000	1
chr5	140856500	140857000	1
chr5	147252500	147253000	-1
chr5	147326000	147326500	-1
chr5	150326000	150326500	1
chr5	157098000	157099000	1
chr5	157393000	157393500	-1
chr5	172751000	172751500	1
chr5	175958500	175959000	1
chr5	178368000	178368500	1
chr5	178487000	178487500	1
chr5	180455000	180455500	-1
chr5	180515500	180516000	-1
chr5	180708000	180709500	-1
chr6	1555000	1555500	1
chr6	13860000	13860500	1
chr6	14640500	14641000	-1
chr6	15209000	15209500	-1
chr6	17940000	17940500	-1
chr6	24357500	24358500	1
chr6	26045500	26046000	1
chr6	27251000	27252000	1
chr6	27783000	27783500	1
chr6	27832000	27832500	1
chr6	28702000	28702500	1
chr6	29818000	29818500	1
chr6	29894000	29895000	1
chr6	30431500	30432500	1
chr6	30434000	30434500	1
chr6	31136000	31136500	-1
chr6	35534500	35535000	-1
chr6	42694500	42695000	1
chr6	52825000	52825500	-1
chr6	74019500	74020000	1
chr6	74024500	74025000	1
chr6	110797000	110798000	1
chr6	146350000	146351000	1
chr6	158885500	158886000	-1
chr6	159151500	159152000	-1
chr6	161100000	161100500	1
chr6	170747500	170748000	1
chr7	1294000	1294500	1
chr7	1782500	1783000	1
chr7	2548500	2549000	1
chr7	4080000	4080500	-1
chr7	4681000	4682000	1
chr7	4722500	4724000	1
chr7	4764500	4765000	1
chr7	5389000	5389500	-1
chr7	5390000	5390500	-1
chr7	5526000	5526500	1
chr7	7250000	7250500	-1
chr7	37531500	37532000	-1
chr7	56174000	56174500	1
chr7	56183500	56184000	1
chr7	56242500	56243500	1
chr7	56355500	56356000	1
chr7	63360500	63361500	1
chr7	63386000	63387500	1
chr7	63506000	63506500	1
chr7	63767500	63768000	1
chr7	63774000	63775000	1
chr7	63924000	63924500	1
chr7	64023000	64023500	1
chr7	64030000	64031000	1
chr7	64342500	64343500	1
chr7	65971000	65971500	1
chr7	73553000	73553500	-1
chr7	73720500	73721500	1
chr7	76027000	76027500	1
chr7	83779500	83780000	-1
chr7	95025500	95026000	1
chr7	99516500	99517500	1
chr7	100946000	100946500	1
chr7	117854000	117855000	1
chr7	148846000	148846500	-1
chr7	149438500	149439000	1
chr7	150020000	150020500	1
chr7	150801500	150802000	-1
chr7	151732500	151733000	-1
chr7	153584000	153584500	1
chr7	158750000	158751000	1
chr8	1750000	1750500	-1
chr8	9008500	9009500	1
chr8	25055500	25056000	-1
chr8	29945500	29946000	-1
chr8	38965000	38965500	1
chr8	41583000	41583500	1
chr8	43101500	43102500	1
chr8	48100000	48101000	1
chr8	57025500	57026500	1
chr8	61834000	61834500	-1
chr8	70906500	70907000	1
chr8	81477000	81477500	-1
chr8	81487500	81488000	-1
chr8	102054000	102054500	-1
chr8	105479000	105479500	1
chr8	125985500	125986000	1
chr8	131961000	131961500	1
chr8	142843000	142843500	1
chr8	144358000	144359000	1
chr8	145638500	145639500	1
chr8	145925500	145926000	1
chr8	145938500	145939500	1
chr9	1045000	1046000	1
chr9	1047500	1048000	1
chr9	1050000	1050500	1
chr9	26976000	26976500	-1
chr9	33750500	33751500	1
chr9	74062500	74063000	-1
chr9	86571000	86572000	1
chr9	95569500	95570000	1
chr9	96623000	96623500	1
chr9	97317000	97317500	-1
chr9	98517000	98517500	-1
chr9	99482000	99482500	1
chr9	99639500	99640000	1
chr9	99839500	99840000	1
chr9	100149500	100150000	1
chr9	102130500	102131000	1
chr9	130416500	130417000	-1
chr9	132320500	132321000	-1
chr9	137028500	137029500	1
chr9	137299000	137299500	1
chr9	137334000	137334500	1
chr9	137367000	137367500	1
chr9	139635500	139636000	1
chr9	139739500	139740000	1
chr9	140200000	140200500	1
chr9	141044500	141045000	1

## Sheet: Blood specific DMR
Chromosome	Start	End	Hyper(+1)/Hypo(-1)
chr1	842000	842500	-1
chr1	1609000	1609500	-1
chr1	2080000	2080500	-1
chr1	2232000	2233000	-1
chr1	2804500	2805000	-1
chr1	3013000	3013500	-1
chr1	3514000	3514500	-1
chr1	6086500	6087000	-1
chr1	6113000	6113500	1
chr1	6525500	6526000	-1
chr1	6580000	6580500	1
chr1	9689500	9691000	-1
chr1	9714000	9714500	-1
chr1	9895500	9896000	1
chr1	10271500	10272000	1
chr1	12233500	12234000	-1
chr1	16472000	16472500	1
chr1	25073000	25073500	1
chr1	26317000	26317500	-1
chr1	26615500	26616000	-1
chr1	26645500	26646000	-1
chr1	27160000	27160500	-1
chr1	28195500	28196000	-1
chr1	31230500	31231000	-1
chr1	32314000	32314500	-1
chr1	32716500	32717000	-1
chr1	32718500	32719000	-1
chr1	33220500	33221000	1
chr1	43814000	43814500	1
chr1	44966000	44966500	1
chr1	45082500	45083500	1
chr1	46860500	46861000	1
chr1	59280500	59281000	1
chr1	92946500	92947500	1
chr1	101704500	101705500	-1
chr1	146549000	146551000	1
chr1	151104500	151105000	1
chr1	160369500	160370000	1
chr1	161039500	161040000	-1
chr1	167407500	167408000	-1
chr1	167486500	167487000	-1
chr1	202129000	202130000	-1
chr1	203734000	203734500	-1
chr1	204486500	204487000	-1
chr1	225655000	225656000	-1
chr1	226900000	226900500	-1
chr1	227954000	227955000	-1
chr10	3462000	3462500	-1
chr10	11220000	11220500	-1
chr10	11222000	11222500	-1
chr10	25010500	25011000	1
chr10	30316500	30317000	-1
chr10	30338000	30338500	-1
chr10	30818000	30819000	-1
chr10	49674000	49674500	1
chr10	71410500	71411000	-1
chr10	101281000	101282000	1
chr10	101284000	101284500	1
chr10	114136000	114136500	-1
chr10	121276000	121276500	-1
chr10	126055500	126056000	-1
chr10	126300500	126301000	-1
chr10	126841500	126842000	1
chr10	134046000	134046500	-1
chr10	134358000	134358500	-1
chr10	134838000	134838500	1
chr11	414500	415500	-1
chr11	1680500	1681000	-1
chr11	1779000	1780000	-1
chr11	1865500	1866000	-1
chr11	1872000	1872500	-1
chr11	1874000	1875000	-1
chr11	1910500	1911000	-1
chr11	2118500	2119000	1
chr11	2321500	2322000	-1
chr11	2322500	2324000	-1
chr11	2468000	2468500	-1
chr11	2488500	2489000	-1
chr11	3647500	3648000	-1
chr11	12133000	12133500	1
chr11	47376500	47377000	1
chr11	47416000	47416500	-1
chr11	58731000	58731500	1
chr11	60739000	60739500	-1
chr11	63687500	63688000	1
chr11	63974000	63975000	-1
chr11	64107500	64108000	-1
chr11	64621000	64621500	-1
chr11	64626000	64627500	-1
chr11	65408000	65409000	-1
chr11	65661500	65662000	-1
chr11	67038500	67039000	-1
chr11	67171500	67172000	-1
chr11	67176500	67177500	-1
chr11	67414000	67414500	-1
chr11	68866500	68867000	-1
chr11	69065000	69065500	-1
chr11	72532500	72533000	1
chr11	75999000	75999500	-1
chr11	121594000	121594500	1
chr11	124621500	124622000	1
chr11	128558000	128558500	1
chr11	128559000	128560500	1
chr12	1642500	1643000	-1
chr12	3262000	3262500	-1
chr12	4417000	4417500	1
chr12	5997000	5997500	-1
chr12	6053500	6054000	1
chr12	6184000	6184500	-1
chr12	6877000	6877500	1
chr12	7035500	7036000	1
chr12	7060000	7063000	-1
chr12	7068000	7069000	-1
chr12	14413500	14414000	1
chr12	24103500	24104000	1
chr12	47700500	47701000	-1
chr12	50453500	50454000	-1
chr12	51717500	51718000	-1
chr12	52249500	52250000	1
chr12	54891500	54892000	-1
chr12	57871000	57871500	-1
chr12	58119500	58121000	1
chr12	58130000	58132000	1
chr12	65904500	65905000	1
chr12	89434000	89434500	-1
chr12	107975000	107975500	1
chr12	109027500	109028000	-1
chr12	111181500	111182000	1
chr12	113683500	113684000	1
chr12	117501000	117501500	-1
chr12	120241000	120242500	1
chr12	120548500	120549000	-1
chr12	122227500	122228500	-1
chr12	122444500	122445000	-1
chr12	124950500	124951000	-1
chr12	132550500	132551000	-1
chr12	133135500	133136000	-1
chr12	133348000	133348500	-1
chr13	21050000	21050500	-1
chr13	24825500	24826000	-1
chr13	30510000	30510500	-1
chr13	114143500	114144000	1
chr13	114549500	114550000	-1
chr13	114876000	114876500	-1
chr13	114908000	114908500	-1
chr14	67955000	67955500	-1
chr14	75800500	75801000	-1
chr14	75920000	75920500	1
chr14	77491500	77493000	1
chr14	93118500	93119500	-1
chr14	100613500	100614000	-1
chr14	101106500	101107000	-1
chr14	102001500	102002000	-1
chr14	103012000	103012500	1
chr14	103413000	103413500	-1
chr14	105127000	105127500	-1
chr14	105148000	105148500	1
chr14	105393000	105393500	-1
chr14	105527000	105528000	-1
chr14	105532000	105532500	-1
chr14	106345500	106346000	-1
chr15	40395500	40396000	1
chr15	40583000	40584000	1
chr15	62643000	62643500	-1
chr15	66999500	67000000	1
chr15	90543000	90543500	1
chr15	90774000	90774500	-1
chr15	91500500	91501000	1
chr15	101938000	101938500	-1
chr16	374500	375500	-1
chr16	1054000	1054500	-1
chr16	3105000	3105500	-1
chr16	3626000	3626500	-1
chr16	3628000	3628500	-1
chr16	4555500	4556000	-1
chr16	8960000	8961000	1
chr16	11327000	11327500	-1
chr16	24066500	24067000	1
chr16	28505500	28506000	-1
chr16	28996000	28996500	-1
chr16	29160000	29160500	-1
chr16	29674500	29676500	-1
chr16	29756000	29756500	-1
chr16	29757500	29758000	-1
chr16	30196500	30197000	-1
chr16	30197500	30198500	-1
chr16	30393500	30394000	-1
chr16	30484500	30485000	-1
chr16	49673500	49674000	1
chr16	50308000	50308500	-1
chr16	67233000	67234000	1
chr16	67918500	67919000	1
chr16	68390000	68391000	-1
chr16	79306000	79306500	-1
chr16	86990000	86990500	-1
chr16	87269500	87270000	-1
chr16	87736000	87736500	-1
chr16	87850000	87850500	-1
chr16	87931000	87931500	-1
chr16	88758500	88759000	-1
chr16	88766500	88770500	-1
chr16	88847500	88848500	-1
chr16	89042000	89042500	-1
chr16	89045000	89045500	-1
chr17	108000	108500	-1
chr17	1160000	1160500	-1
chr17	1835500	1836000	1
chr17	2699500	2700500	-1
chr17	2718500	2719000	-1
chr17	3790000	3790500	-1
chr17	4337000	4337500	-1
chr17	7254000	7254500	1
chr17	8868000	8868500	-1
chr17	14213000	14213500	1
chr17	17713500	17714000	1
chr17	19780000	19780500	-1
chr17	27506000	27506500	1
chr17	38473000	38473500	1
chr17	43300500	43301000	-1
chr17	45780500	45781000	-1
chr17	46131500	46132500	1
chr17	46388000	46388500	1
chr17	46631500	46632500	1
chr17	46699000	46699500	1
chr17	46700000	46700500	1
chr17	55740000	55740500	1
chr17	56408000	56409000	-1
chr17	56409500	56411000	-1
chr17	61775500	61776000	-1
chr17	61784500	61785000	-1
chr17	62009000	62010000	-1
chr17	71338000	71338500	1
chr17	71588000	71588500	-1
chr17	73839000	73840000	-1
chr17	74141500	74142000	-1
chr17	75396500	75397000	-1
chr17	75921000	75921500	1
chr17	76117000	76118500	-1
chr17	76121000	76122000	-1
chr17	76127000	76127500	-1
chr17	76339500	76340500	-1
chr17	77916500	77917000	-1
chr17	78238500	78239000	-1
chr17	79420500	79421000	-1
chr17	80061500	80062000	1
chr17	80261000	80261500	-1
chr17	80407000	80408000	-1
chr17	81147000	81147500	-1
chr18	9404500	9405000	-1
chr18	13377000	13377500	-1
chr18	13500000	13500500	1
chr18	46361000	46361500	-1
chr18	48678500	48679000	-1
chr18	74799000	74799500	1
chr18	74811500	74812000	-1
chr18	77165500	77166000	-1
chr18	77283000	77283500	-1
chr18	77284000	77284500	-1
chr18	77327500	77328000	1
chr19	695500	696000	-1
chr19	1068000	1069500	-1
chr19	1070500	1071500	1
chr19	1088000	1088500	-1
chr19	1608500	1609000	-1
chr19	1895000	1896000	-1
chr19	1967000	1967500	-1
chr19	2082500	2084000	-1
chr19	2084500	2086000	-1
chr19	2540500	2541500	1
chr19	2602500	2603500	1
chr19	3178500	3181000	-1
chr19	3507500	3508000	1
chr19	3969500	3970000	1
chr19	4089500	4090000	-1
chr19	4108500	4109500	-1
chr19	4916500	4917000	-1
chr19	6475500	6477000	1
chr19	6772500	6773500	-1
chr19	8590500	8591500	1
chr19	10215500	10216000	-1
chr19	10445000	10446000	1
chr19	10450000	10450500	-1
chr19	10842000	10842500	-1
chr19	13168000	13168500	1
chr19	13215500	13216000	-1
chr19	14551000	14551500	-1
chr19	15563500	15564500	1
chr19	15567500	15569000	1
chr19	15574500	15575000	-1
chr19	16197000	16197500	-1
chr19	16705000	16705500	-1
chr19	17295000	17296000	-1
chr19	17354500	17355000	1
chr19	17862000	17862500	-1
chr19	17877500	17878000	1
chr19	18549500	18550000	1
chr19	30171500	30172000	-1
chr19	33133500	33134000	-1
chr19	33528500	33529000	-1
chr19	33751500	33752000	-1
chr19	33863000	33863500	-1
chr19	34289500	34290000	1
chr19	35505000	35505500	-1
chr19	36233000	36233500	-1
chr19	39086500	39087500	1
chr19	39369000	39369500	-1
chr19	39826000	39826500	-1
chr19	46031500	46032000	1
chr19	46876500	46877000	1
chr19	46997500	46998000	-1
chr19	49842000	49843000	1
chr19	49973000	49974000	-1
chr19	50003000	50003500	-1
chr19	50058000	50058500	-1
chr19	54597500	54598000	-1
chr19	54932000	54932500	1
chr19	55765000	55766000	-1
chr2	429500	430000	-1
chr2	3825500	3826000	-1
chr2	10470500	10472000	-1
chr2	12868500	12869000	-1
chr2	23837500	23838000	-1
chr2	25425000	25425500	-1
chr2	28571000	28571500	-1
chr2	28633000	28633500	-1
chr2	29237500	29238000	-1
chr2	43361000	43362000	-1
chr2	43398000	43398500	-1
chr2	54087000	54087500	1
chr2	73495500	73496000	1
chr2	74668000	74668500	1
chr2	85483000	85483500	1
chr2	85486000	85486500	1
chr2	98698000	98698500	-1
chr2	106776500	106777000	-1
chr2	109830000	109830500	-1
chr2	129018000	129018500	1
chr2	129492000	129492500	-1
chr2	131128000	131128500	-1
chr2	203014000	203014500	1
chr2	231524000	231524500	-1
chr2	232486000	232486500	1
chr2	233924500	233925500	-1
chr2	233926000	233926500	-1
chr2	235199000	235199500	-1
chr2	238603000	238603500	-1
chr2	240189000	240189500	-1
chr2	240884500	240885000	-1
chr2	242785000	242785500	-1
chr2	242927000	242927500	-1
chr20	3074000	3074500	-1
chr20	4135500	4136000	-1
chr20	4795000	4796000	-1
chr20	31261000	31261500	-1
chr20	35490500	35491000	1
chr20	36781000	36781500	-1
chr20	45948500	45949000	1
chr20	47332500	47333000	-1
chr20	49002500	49003000	-1
chr20	55826000	55826500	-1
chr20	56196000	56196500	-1
chr20	61590500	61591000	-1
chr20	61605500	61606000	1
chr20	61609000	61609500	-1
chr20	62153000	62153500	1
chr20	62199000	62200000	-1
chr20	62709000	62709500	-1
chr21	17652000	17652500	1
chr21	20866500	20867000	-1
chr21	32554500	32555000	-1
chr21	34406000	34406500	1
chr21	34436500	34437000	1
chr21	36901000	36901500	-1
chr21	38597500	38598000	-1
chr21	40285000	40285500	1
chr21	44104500	44105000	-1
chr21	44819000	44820000	-1
chr21	45503500	45504500	-1
chr21	45577500	45578000	-1
chr21	45579500	45580000	-1
chr21	46340000	46340500	-1
chr21	46346000	46346500	-1
chr21	46902500	46903500	-1
chr22	17679500	17680000	1
chr22	17715000	17715500	1
chr22	18640000	18640500	1
chr22	18914000	18914500	-1
chr22	24823000	24824500	-1
chr22	26975000	26975500	-1
chr22	28195500	28196000	1
chr22	29280500	29281000	1
chr22	30661500	30663000	-1
chr22	37608500	37609000	1
chr22	37638500	37639000	-1
chr22	37697000	37697500	-1
chr22	37880500	37882000	-1
chr22	38023500	38024000	-1
chr22	39148000	39148500	-1
chr22	39572000	39572500	1
chr22	47009500	47010000	-1
chr22	47070000	47071000	-1
chr22	49114000	49114500	-1
chr22	50050500	50051500	-1
chr22	50319000	50320000	-1
chr22	50497500	50498000	1
chr22	50550500	50551000	-1
chr22	50611500	50612000	-1
chr22	50753000	50753500	-1
chr22	51135000	51135500	1
chr22	51136000	51136500	1
chr22	51158500	51159000	1
chr3	9988500	9989000	1
chr3	12957500	12958000	-1
chr3	13057500	13058000	-1
chr3	13060500	13061000	1
chr3	13455500	13456000	-1
chr3	14472500	14473500	-1
chr3	16884000	16884500	-1
chr3	38415500	38416000	-1
chr3	47029000	47029500	-1
chr3	49170000	49170500	1
chr3	56789000	56789500	-1
chr3	57743000	57744000	1
chr3	58186500	58187000	-1
chr3	63899000	63899500	1
chr3	67706000	67706500	-1
chr3	71276000	71276500	-1
chr3	107148000	107148500	1
chr3	127202500	127203000	-1
chr3	128734500	128735000	-1
chr3	149687000	149687500	1
chr3	169758000	169758500	1
chr3	183272500	183273500	-1
chr3	184280500	184281000	1
chr3	188665500	188666000	1
chr3	196367500	196368000	-1
chr3	196393000	196393500	1
chr4	1210500	1211000	-1
chr4	2292500	2293000	-1
chr4	3304500	3305000	-1
chr4	7444500	7445000	-1
chr4	7807500	7808000	1
chr4	38754500	38755000	1
chr4	129783000	129783500	-1
chr5	392500	393000	-1
chr5	484000	484500	-1
chr5	544000	544500	-1
chr5	1104500	1105000	-1
chr5	1313500	1314000	-1
chr5	6775500	6776000	-1
chr5	78986000	78986500	1
chr5	133422500	133423000	-1
chr5	133455000	133455500	-1
chr5	138850500	138851000	-1
chr5	149589000	149589500	-1
chr5	169724000	169725000	-1
chr5	171094500	171095500	1
chr5	171541500	171542500	-1
chr5	171602500	171603000	-1
chr5	175957500	175958000	-1
chr5	176793500	176794500	1
chr5	177870000	177870500	-1
chr6	10556000	10556500	1
chr6	13014500	13015500	1
chr6	20024000	20024500	-1
chr6	25035500	25036000	-1
chr6	25042000	25042500	-1
chr6	26225000	26225500	1
chr6	32121000	32121500	1
chr6	32813000	32814000	-1
chr6	33546000	33546500	-1
chr6	35285500	35286500	1
chr6	35463500	35464000	1
chr6	42335000	42335500	-1
chr6	43740000	43741000	1
chr6	106968500	106969000	-1
chr6	109103000	109103500	1
chr6	167507500	167508000	-1
chr6	168107000	168107500	-1
chr6	170403000	170403500	-1
chr6	170580500	170581500	-1
chr7	391500	392000	-1
chr7	644000	644500	-1
chr7	1859000	1859500	-1
chr7	1959500	1960000	-1
chr7	2160000	2160500	-1
chr7	2568500	2569000	-1
chr7	3134500	3135000	-1
chr7	22397000	22397500	1
chr7	22601000	22601500	1
chr7	27138500	27139000	1
chr7	27146000	27146500	1
chr7	27150000	27151000	1
chr7	27152500	27153500	1
chr7	27176000	27176500	1
chr7	27182000	27184000	1
chr7	37392500	37393000	-1
chr7	45002000	45002500	1
chr7	45018500	45019000	-1
chr7	45067500	45068500	-1
chr7	47367500	47368000	1
chr7	50728000	50728500	-1
chr7	72843500	72844000	1
chr7	75247000	75247500	-1
chr7	98978500	98979000	-1
chr7	98991000	98991500	1
chr7	99222000	99222500	-1
chr7	100485000	100485500	-1
chr7	100875500	100876000	1
chr7	102066500	102067500	-1
chr7	104581500	104582000	-1
chr7	127907000	127907500	1
chr7	128580500	128581500	-1
chr7	138776000	138776500	-1
chr7	138789500	138790000	-1
chr7	150147500	150148500	-1
chr7	150759500	150760500	1
chr7	155556500	155557000	-1
chr7	157378000	157378500	-1
chr7	157809000	157809500	1
chr8	1803000	1803500	-1
chr8	22446500	22447000	1
chr8	26298000	26298500	-1
chr8	28918500	28919000	-1
chr8	37659000	37659500	1
chr8	38369500	38370000	1
chr8	50219500	50220000	-1
chr8	93074500	93075000	1
chr8	142046000	142046500	-1
chr8	142100000	142100500	-1
chr8	142413000	142413500	-1
chr8	143282500	143283000	-1
chr8	144544500	144545000	-1
chr8	144631500	144632000	-1
chr8	145053000	145053500	-1
chr8	145808500	145809000	-1
chr8	145900500	145901500	-1
chr9	5841500	5842000	-1
chr9	14321000	14321500	1
chr9	16705000	16705500	1
chr9	34457000	34457500	1
chr9	38164500	38165000	-1
chr9	87905000	87905500	-1
chr9	95727000	95728000	-1
chr9	95728500	95729000	-1
chr9	95826500	95827000	-1
chr9	96080000	96080500	-1
chr9	116225500	116226500	1
chr9	116327500	116328000	1
chr9	117135000	117135500	-1
chr9	126101500	126102500	-1
chr9	127258000	127258500	-1
chr9	130516500	130517500	1
chr9	130538500	130540000	-1
chr9	130861000	130861500	1
chr9	131156500	131157000	1
chr9	132257500	132258000	1
chr9	132631500	132632000	-1
chr9	132650500	132651000	-1
chr9	134128000	134128500	-1
chr9	134148500	134149000	-1
chr9	134150500	134151500	-1
chr9	137160000	137160500	-1
chr9	137534500	137535500	1
chr9	137663000	137663500	-1
chr9	138999000	138999500	-1
chr9	139428000	139428500	-1
chr9	139434000	139434500	-1
chr9	139550500	139552000	-1
chr9	139553000	139554000	-1
chr9	140356500	140357000	-1

## Sheet: Breast specific DMR
Chromosome	Start	End	Hyper(+1)/Hypo(-1)
chr1	1226500	1227000	-1
chr1	1266500	1267500	-1
chr1	1268000	1269000	-1
chr1	1552000	1552500	-1
chr1	1878000	1878500	-1
chr1	2750500	2751000	-1
chr1	2771500	2772000	-1
chr1	2778500	2779500	-1
chr1	2791500	2792000	-1
chr1	2823000	2823500	-1
chr1	2948000	2948500	-1
chr1	3103000	3103500	-1
chr1	4078500	4079000	-1
chr1	4193500	4194000	-1
chr1	7020500	7021000	-1
chr1	7448000	7448500	-1
chr1	7515500	7516000	-1
chr1	8065000	8065500	-1
chr1	10695500	10696000	-1
chr1	10885000	10885500	-1
chr1	10960000	10960500	-1
chr1	11118500	11119000	-1
chr1	11979000	11979500	-1
chr1	22677500	22678000	1
chr1	25473000	25473500	-1
chr1	42385500	42386000	1
chr1	48217500	48218000	-1
chr1	48449500	48450500	1
chr1	110610000	110610500	1
chr1	150531500	150532000	-1
chr1	156092000	156093000	-1
chr1	170629500	170630000	1
chr1	202004000	202004500	-1
chr1	221050000	221051000	1
chr1	226322500	226323000	-1
chr1	227162000	227162500	-1
chr1	229253500	229254000	-1
chr1	234342500	234343000	-1
chr1	235133000	235133500	-1
chr10	5674000	5674500	-1
chr10	21789000	21789500	1
chr10	24754500	24755000	-1
chr10	28030000	28030500	1
chr10	44788000	44788500	1
chr10	75579000	75579500	-1
chr10	81198000	81198500	-1
chr10	98944500	98945000	1
chr10	104543000	104543500	-1
chr10	112096000	112096500	-1
chr10	121130500	121131000	-1
chr10	121201000	121201500	-1
chr10	123923500	123924000	1
chr10	126749000	126749500	-1
chr10	132292000	132292500	-1
chr10	132364500	132365000	-1
chr10	132560000	132560500	-1
chr10	132976000	132976500	-1
chr10	134277500	134278000	-1
chr10	134646000	134646500	-1
chr10	134647000	134647500	-1
chr10	134649500	134650000	-1
chr10	134697000	134697500	-1
chr10	134910000	134910500	-1
chr11	394500	395000	-1
chr11	841000	841500	-1
chr11	1225000	1225500	-1
chr11	1245000	1245500	-1
chr11	1325500	1326000	-1
chr11	1360000	1360500	-1
chr11	1507500	1508000	-1
chr11	1965000	1965500	-1
chr11	2115500	2116000	-1
chr11	2846500	2847000	-1
chr11	47431000	47431500	-1
chr11	60927500	60928000	-1
chr11	64146000	64146500	-1
chr11	66646000	66646500	-1
chr11	68121500	68122500	-1
chr11	69192000	69192500	-1
chr11	71724500	71725000	-1
chr11	71952000	71952500	1
chr11	115531000	115531500	1
chr11	130767000	130767500	-1
chr11	133917500	133918000	-1
chr12	1684500	1685000	-1
chr12	6493500	6494500	-1
chr12	11121500	11122000	-1
chr12	53445500	53446000	-1
chr12	54088500	54089000	1
chr12	54409000	54409500	1
chr12	54441500	54442000	1
chr12	56115000	56115500	-1
chr12	57569500	57570000	-1
chr12	57630000	57630500	1
chr12	115104500	115105000	1
chr12	115124500	115125000	1
chr12	115135000	115135500	1
chr12	115138000	115138500	1
chr12	115173000	115173500	1
chr12	121998500	121999000	-1
chr12	123883000	123883500	-1
chr12	124371500	124372000	-1
chr12	124844500	124845500	-1
chr12	124866000	124866500	-1
chr12	124906500	124907500	-1
chr12	125004500	125005000	-1
chr12	130612500	130613000	-1
chr12	130648500	130649500	1
chr12	132386500	132387000	-1
chr12	132660500	132661000	-1
chr12	132952500	132953000	-1
chr12	132975500	132976000	-1
chr12	132984000	132984500	-1
chr12	133007500	133008000	-1
chr12	133071000	133072000	-1
chr13	20805000	20806000	1
chr13	28425500	28426000	-1
chr13	49888000	49888500	-1
chr13	110337500	110338000	-1
chr13	113097000	113097500	-1
chr13	113585500	113586000	-1
chr13	114432000	114432500	-1
chr13	114524000	114524500	-1
chr13	114540000	114540500	-1
chr13	114541000	114541500	-1
chr13	114630500	114631000	-1
chr13	114631500	114632000	-1
chr14	35805500	35806000	-1
chr14	69418500	69419000	-1
chr14	73084500	73085000	-1
chr14	76447000	76447500	-1
chr14	94253500	94254500	1
chr14	94467500	94468000	-1
chr14	95238000	95238500	1
chr14	101942000	101942500	-1
chr14	105435000	105435500	-1
chr15	29640500	29641000	-1
chr15	61497500	61498000	-1
chr15	74346000	74346500	-1
chr15	78632000	78632500	1
chr15	92411000	92411500	-1
chr15	96895000	96895500	1
chr15	96901000	96902000	1
chr15	99124000	99124500	-1
chr15	101267500	101268000	-1
chr16	152500	153000	-1
chr16	1078000	1078500	-1
chr16	1114500	1115000	-1
chr16	1151000	1152000	-1
chr16	1166500	1167000	-1
chr16	1206500	1207000	-1
chr16	1338000	1338500	-1
chr16	1349000	1350000	-1
chr16	1582000	1582500	-1
chr16	2086000	2086500	-1
chr16	4729500	4731000	-1
chr16	4985500	4986000	-1
chr16	5115500	5116000	-1
chr16	10652500	10653000	-1
chr16	11734000	11734500	-1
chr16	28550000	28551000	-1
chr16	29141000	29141500	-1
chr16	30078500	30079000	-1
chr16	31013500	31014000	-1
chr16	31488500	31489000	1
chr16	54322500	54323500	1
chr16	54324000	54324500	1
chr16	54325000	54326000	1
chr16	54611500	54612000	1
chr16	55361500	55362000	1
chr16	55362500	55363500	1
chr16	55364500	55365000	1
chr16	55365500	55366000	1
chr16	56668500	56670000	1
chr16	67199000	67199500	1
chr16	81434500	81435000	-1
chr16	85157500	85158000	-1
chr16	86085000	86085500	-1
chr16	86915500	86916000	-1
chr16	86994500	86995500	-1
chr16	87161000	87161500	-1
chr16	87194000	87194500	-1
chr16	88365500	88366000	-1
chr16	88472500	88473000	-1
chr16	89133500	89134000	-1
chr17	1092000	1092500	-1
chr17	1358000	1358500	-1
chr17	2310500	2311000	-1
chr17	3563000	3563500	-1
chr17	7389000	7389500	-1
chr17	8927000	8927500	1
chr17	9810000	9810500	-1
chr17	15313000	15313500	-1
chr17	26711500	26712500	1
chr17	37158500	37159000	-1
chr17	38642500	38643000	-1
chr17	40715000	40715500	-1
chr17	59480000	59481000	1
chr17	59482000	59483500	1
chr17	59485500	59486000	1
chr17	60856500	60857000	-1
chr17	66488000	66488500	-1
chr17	71288000	71288500	-1
chr17	72157500	72158000	-1
chr17	75316000	75317500	-1
chr17	75319000	75319500	-1
chr17	75419500	75420000	-1
chr17	75423500	75424000	-1
chr17	75905000	75906000	-1
chr17	78042500	78043000	-1
chr17	78161000	78162000	-1
chr17	79018500	79019000	-1
chr17	80200000	80200500	-1
chr17	80204500	80205000	-1
chr17	80225500	80226000	-1
chr17	80266500	80267000	-1
chr17	81143500	81144000	-1
chr18	8990500	8991000	-1
chr18	74271000	74271500	-1
chr18	75884500	75885000	-1
chr18	76066000	76066500	-1
chr18	77557000	77557500	-1
chr18	77722000	77722500	-1
chr19	343000	344000	-1
chr19	374000	374500	-1
chr19	1155000	1155500	-1
chr19	1168500	1171000	-1
chr19	1271000	1271500	-1
chr19	1395500	1396000	-1
chr19	1416500	1417000	-1
chr19	1807500	1808000	-1
chr19	2186000	2186500	-1
chr19	2723000	2723500	-1
chr19	2953000	2953500	-1
chr19	3025000	3025500	1
chr19	3096500	3097000	-1
chr19	3097500	3099000	-1
chr19	3267000	3267500	-1
chr19	3409500	3410000	-1
chr19	3899500	3900000	-1
chr19	4053000	4053500	-1
chr19	4062000	4062500	-1
chr19	4086500	4087000	-1
chr19	4391500	4392000	-1
chr19	4713500	4714000	-1
chr19	5994000	5994500	-1
chr19	6233000	6233500	-1
chr19	6239000	6239500	-1
chr19	6273500	6274500	-1
chr19	6376500	6377000	-1
chr19	8431500	8432000	-1
chr19	10338000	10338500	-1
chr19	10855000	10855500	-1
chr19	13205500	13206000	1
chr19	13210000	13210500	1
chr19	16199000	16199500	-1
chr19	16437500	16438000	1
chr19	18385500	18386500	-1
chr19	18960000	18960500	-1
chr19	30169500	30170000	-1
chr19	31844000	31844500	1
chr19	33998000	33999000	-1
chr19	40786500	40787000	-1
chr19	46269500	46270000	-1
chr19	46284500	46285000	-1
chr19	46286500	46287000	-1
chr19	49033500	49034000	-1
chr19	49590000	49590500	-1
chr19	52227500	52228000	-1
chr19	53427000	53427500	-1
chr19	54759000	54759500	-1
chr2	2767000	2767500	-1
chr2	19550500	19551000	1
chr2	28906000	28906500	-1
chr2	38742500	38743000	-1
chr2	45231000	45231500	1
chr2	45233000	45234000	1
chr2	45235500	45236000	1
chr2	63279000	63280500	1
chr2	71131500	71132000	1
chr2	73217000	73217500	-1
chr2	97563000	97563500	-1
chr2	97593000	97593500	-1
chr2	109934500	109935000	-1
chr2	111876000	111877500	1
chr2	119566000	119566500	1
chr2	119594500	119595000	1
chr2	127841500	127842000	-1
chr2	170572000	170572500	-1
chr2	171830500	171831000	-1
chr2	172945000	172945500	1
chr2	236172500	236173000	-1
chr2	237067500	237068000	1
chr2	238467500	238468000	-1
chr2	239924500	239925000	-1
chr2	240893000	240893500	-1
chr2	241190500	241191000	-1
chr2	241838000	241838500	-1
chr2	241931000	241931500	-1
chr2	242787000	242787500	-1
chr20	31053000	31054000	-1
chr20	36036000	36036500	-1
chr20	39319500	39321000	1
chr20	43966500	43967000	-1
chr20	46955500	46956000	-1
chr20	48915000	48915500	-1
chr20	55356000	55356500	-1
chr20	58158500	58159000	-1
chr20	59443500	59444000	-1
chr20	60204500	60205000	-1
chr20	60259000	60259500	-1
chr20	60784000	60784500	-1
chr20	60814500	60815000	-1
chr20	61905000	61905500	-1
chr20	61976000	61976500	-1
chr20	62290500	62291000	-1
chr20	62313500	62314000	-1
chr21	36399000	36399500	1
chr21	37618500	37619000	-1
chr21	40455000	40455500	-1
chr21	42396500	42397000	-1
chr21	43222500	43223500	-1
chr21	43534000	43534500	-1
chr21	44739000	44739500	-1
chr21	44753500	44754000	-1
chr21	45230000	45230500	-1
chr21	46675000	46675500	-1
chr21	46874000	46874500	-1
chr21	46875500	46876000	-1
chr21	47369500	47370500	-1
chr21	47469000	47469500	-1
chr21	47485000	47485500	-1
chr22	18266000	18266500	-1
chr22	19608500	19609000	-1
chr22	24815500	24816000	-1
chr22	26813000	26813500	-1
chr22	29706500	29707000	-1
chr22	33392500	33393000	-1
chr22	35827000	35827500	-1
chr22	36042500	36043000	-1
chr22	36719500	36721000	-1
chr22	38172500	38173000	-1
chr22	38435000	38435500	-1
chr22	41048500	41049000	-1
chr22	41920000	41920500	-1
chr22	43041500	43042000	-1
chr22	43618000	43619000	-1
chr22	43821000	43821500	-1
chr22	44844000	44844500	-1
chr22	46307500	46308000	-1
chr22	46330500	46331000	-1
chr22	46454500	46455500	-1
chr22	46459500	46460500	-1
chr22	46475000	46475500	-1
chr22	46479500	46481000	-1
chr22	46481500	46482500	-1
chr22	46484500	46485000	-1
chr22	46486000	46486500	-1
chr22	46488500	46489000	-1
chr22	46498500	46499000	-1
chr22	46499500	46500000	-1
chr22	46501000	46502000	-1
chr22	46511500	46512000	-1
chr22	49350500	49351000	-1
chr22	50735500	50736000	-1
chr3	4783500	4784000	-1
chr3	11178500	11179000	-1
chr3	15687500	15688000	-1
chr3	40732500	40733000	-1
chr3	43042500	43043000	-1
chr3	48636500	48637000	-1
chr3	50312500	50313500	1
chr3	50395500	50396000	-1
chr3	53107500	53108000	-1
chr3	57038000	57038500	-1
chr3	128967000	128967500	-1
chr3	129204500	129205000	-1
chr3	134565500	134566000	-1
chr3	184099500	184100000	1
chr4	671500	672000	-1
chr4	1041500	1042000	-1
chr4	1047000	1047500	-1
chr4	1550000	1550500	-1
chr4	3647000	3647500	-1
chr4	3653500	3654000	-1
chr4	4410000	4410500	-1
chr4	4864000	4865000	1
chr4	6751000	6751500	-1
chr4	7632000	7632500	-1
chr4	8702000	8702500	-1
chr4	8763000	8763500	-1
chr4	8870500	8871000	1
chr4	8913500	8914000	-1
chr4	13544500	13545500	1
chr4	141563000	141563500	-1
chr4	146655500	146656000	-1
chr5	430000	430500	-1
chr5	1118000	1118500	-1
chr5	1128000	1128500	-1
chr5	1952500	1953000	1
chr5	2007500	2008500	-1
chr5	2135000	2135500	-1
chr5	2442500	2443000	-1
chr5	2738500	2739000	1
chr5	2757500	2758000	1
chr5	32709000	32709500	1
chr5	42991500	42992000	1
chr5	54519500	54520000	1
chr5	76384000	76384500	-1
chr5	132161000	132162000	1
chr5	133513500	133514000	-1
chr5	134376500	134377000	1
chr5	139081000	139081500	1
chr5	140871000	140872000	1
chr5	141980500	141981000	-1
chr5	168124000	168124500	-1
chr5	172160500	172161000	-1
chr5	172287500	172288000	-1
chr5	172673000	172673500	1
chr5	177505000	177506000	-1
chr6	30720000	30720500	-1
chr6	33288500	33289000	-1
chr6	38144500	38145000	-1
chr6	89296500	89297000	-1
chr6	89745000	89745500	-1
chr6	106434000	106434500	1
chr6	108441000	108441500	1
chr6	108489000	108489500	1
chr6	111912500	111913000	-1
chr6	132270000	132270500	-1
chr6	156983000	156983500	-1
chr6	159259000	159259500	-1
chr6	167529500	167530500	-1
chr6	168417500	168418000	-1
chr6	168811000	168811500	-1
chr6	169852000	169853000	-1
chr7	305000	305500	-1
chr7	906500	907000	-1
chr7	1031000	1031500	-1
chr7	1503500	1504000	-1
chr7	1707500	1708000	1
chr7	2490000	2490500	-1
chr7	2518000	2519000	-1
chr7	2706000	2706500	-1
chr7	5554000	5554500	-1
chr7	44795500	44796000	-1
chr7	47611500	47612000	-1
chr7	56160500	56161000	-1
chr7	73295000	73295500	-1
chr7	73307500	73308000	-1
chr7	73476000	73476500	-1
chr7	75522000	75522500	-1
chr7	101288000	101288500	-1
chr7	130013500	130014000	-1
chr7	155006000	155007000	-1
chr7	155049000	155050000	-1
chr7	155276500	155277000	-1
chr7	157650500	157651000	-1
chr7	158224500	158225500	-1
chr8	10586500	10587000	1
chr8	21961500	21962000	-1
chr8	41200500	41201000	1
chr8	49494000	49494500	-1
chr8	49532500	49533000	-1
chr8	65499500	65500000	1
chr8	87354000	87354500	-1
chr8	102450500	102451000	-1
chr8	103820000	103820500	-1
chr8	124194000	124194500	-1
chr8	128866500	128867000	-1
chr8	129189000	129189500	-1
chr8	143171000	143171500	-1
chr8	143265000	143265500	-1
chr8	143694000	143695000	-1
chr8	144207000	144207500	-1
chr8	144303000	144303500	-1
chr8	144488000	144488500	-1
chr8	144948500	144949000	-1
chr8	145020000	145020500	-1
chr8	145648000	145648500	-1
chr9	34578500	34579000	1
chr9	35905500	35906500	-1
chr9	73204500	73205000	-1
chr9	100639000	100639500	-1
chr9	130325000	130325500	-1
chr9	130608500	130609000	-1
chr9	131397500	131398000	-1
chr9	131622500	131623000	-1
chr9	131678500	131679000	-1
chr9	132403000	132403500	-1
chr9	132514000	132514500	-1
chr9	133349500	133350000	1
chr9	133773000	133774000	-1
chr9	137884500	137885000	-1
chr9	138157500	138158000	-1
chr9	138559000	138559500	-1
chr9	138997500	138998000	-1
chr9	139841500	139842000	-1
chr9	140111500	140112000	-1

## Sheet: Brain specific DMR
Chromosome	Start	End	Hyper(+1)/Hypo(-1)					Chromosome	Start	End	Hyper(+1)/Hypo(-1)
								chr1	2023500	2024000	-1
								chr1	2170500	2171000	-1
								chr1	3003000	3003500	-1
								chr1	3038000	3039000	-1
								chr1	3042000	3042500	-1
								chr1	3070000	3071000	-1
								chr1	3115000	3116000	-1
								chr1	3128500	3129000	-1
								chr1	3129500	3130000	-1
								chr1	3248500	3249000	-1
								chr1	4671500	4672000	-1
								chr1	7728500	7729000	-1
								chr1	10769500	10770000	-1
								chr1	10873500	10874500	-1
								chr1	17037000	17037500	-1
								chr1	17971500	17972000	-1
								chr1	17995000	17995500	-1
								chr1	18275000	18275500	-1
								chr1	18387000	18387500	-1
								chr1	18406500	18407000	-1
								chr1	18475500	18476000	-1
								chr1	19066500	19067000	-1
								chr1	21037500	21038000	-1
								chr1	23049500	23050000	-1
								chr1	23063000	23063500	-1
								chr1	23133000	23133500	-1
								chr1	26085000	26085500	-1
								chr1	27918500	27919000	-1
								chr1	37437500	37438000	-1
								chr1	37513000	37513500	-1
								chr1	37773500	37774000	-1
								chr1	38724000	38724500	-1
								chr1	41856000	41856500	-1
								chr1	42603500	42604000	-1
								chr1	44482500	44483000	-1
								chr1	44708500	44709000	-1
								chr1	44716000	44716500	-1
								chr1	44718000	44718500	-1
								chr1	45103500	45104000	-1
								chr1	50571500	50572000	-1
								chr1	53754000	53754500	-1
								chr1	53777000	53777500	-1
								chr1	54757000	54757500	-1
								chr1	60438000	60438500	-1
								chr1	61331000	61331500	-1
								chr1	77230500	77231000	-1
								chr1	112447000	112447500	-1
								chr1	155166500	155167000	-1
								chr1	156395000	156395500	-1
								chr1	168104000	168104500	-1
								chr1	180151500	180152500	-1
								chr1	184194500	184195000	-1
								chr1	204232000	204232500	-1
								chr1	204839500	204840000	-1
								chr1	208441000	208441500	-1
								chr1	209804000	209804500	-1
								chr1	214382000	214382500	-1
								chr1	226685500	226686000	-1
								chr1	230272000	230272500	-1
								chr1	234417500	234418000	-1
								chr1	244217500	244218000	-1
								chr1	244260000	244260500	-1
								chr1	245752500	245753500	-1
								chr10	1358000	1358500	-1
								chr10	1595500	1596000	-1
								chr10	2327500	2328000	-1
								chr10	2815000	2815500	-1
								chr10	3283500	3284000	-1
								chr10	3313000	3313500	-1
								chr10	7486500	7487000	-1
								chr10	10336500	10337500	-1
								chr10	16991500	16992000	-1
								chr10	21550500	21551000	-1
								chr10	25160500	25161000	-1
								chr10	29186500	29187000	-1
								chr10	31070500	31071000	-1
								chr10	31124000	31124500	-1
								chr10	32063000	32063500	-1
								chr10	71656500	71657000	-1
								chr10	72228500	72229000	-1
								chr10	72801000	72801500	-1
								chr10	77794500	77795000	-1
								chr10	79936500	79937500	-1
								chr10	79978500	79979000	-1
								chr10	80444500	80445000	-1
								chr10	87847500	87848000	-1
								chr10	88004000	88004500	-1
								chr10	98871000	98871500	-1
								chr10	98894000	98894500	-1
								chr10	103410500	103411000	-1
								chr10	115003500	115004000	-1
								chr10	119507500	119508000	-1
								chr10	123951500	123952000	-1
								chr10	126056500	126057000	-1
								chr10	126331500	126332500	-1
								chr10	126334000	126334500	-1
								chr10	126716500	126717000	-1
								chr10	130228500	130229000	-1
								chr10	130492500	130493500	-1
								chr10	130854000	130854500	-1
								chr10	131556500	131557500	-1
								chr10	131691000	131691500	-1
								chr10	131695000	131695500	-1
								chr10	133980000	133980500	-1
								chr10	134058500	134059000	-1
								chr10	134246000	134246500	-1
								chr10	134491000	134491500	-1
								chr10	134527000	134527500	-1
								chr10	134529000	134529500	-1
								chr11	890500	891500	-1
								chr11	1483500	1484000	-1
								chr11	2349500	2350000	-1
								chr11	2563500	2564000	-1
								chr11	2871500	2872000	-1
								chr11	15322000	15322500	-1
								chr11	15587500	15588000	-1
								chr11	17787000	17787500	-1
								chr11	34306500	34307000	-1
								chr11	36235000	36235500	-1
								chr11	44898500	44899000	-1
								chr11	60893000	60893500	-1
								chr11	63783500	63784500	-1
								chr11	63831000	63831500	-1
								chr11	63835500	63836000	-1
								chr11	63887000	63887500	-1
								chr11	66047500	66048500	-1
								chr11	68478000	68478500	-1
								chr11	68920500	68921000	-1
								chr11	69206500	69207000	-1
								chr11	69643000	69643500	-1
								chr11	70323500	70324000	-1
								chr11	70368500	70369000	-1
								chr11	70733000	70733500	-1
								chr11	73068500	73069000	-1
								chr11	78964000	78964500	-1
								chr11	116033000	116033500	-1
								chr11	119406000	119406500	-1
								chr11	131632500	131633000	-1
								chr11	131689500	131690000	-1
								chr12	2664500	2665000	-1
								chr12	3332000	3332500	-1
								chr12	4099500	4100000	-1
								chr12	4403500	4404000	-1
								chr12	49380500	49381000	-1
								chr12	52311500	52312000	-1
								chr12	94929000	94929500	-1
								chr12	103372000	103372500	-1
								chr12	103494000	103494500	-1
								chr12	109797000	109797500	-1
								chr12	111725000	111726000	-1
								chr12	112818500	112819000	-1
								chr12	113819000	113819500	-1
								chr12	114265000	114265500	-1
								chr12	116008000	116008500	-1
								chr12	117407500	117408500	-1
								chr12	117440000	117440500	-1
								chr12	117498000	117498500	-1
								chr12	120800500	120801500	-1
								chr12	123562000	123563000	-1
								chr12	125202500	125203000	-1
								chr12	125271500	125272000	-1
								chr12	130913500	130914000	-1
								chr12	131237500	131238000	-1
								chr12	131488000	131488500	-1
								chr12	131864000	131865000	-1
								chr12	132497500	132498000	-1
								chr12	133111500	133112000	-1
								chr12	133123000	133123500	-1
								chr13	21010000	21010500	-1
								chr13	22794500	22795000	-1
								chr13	31306000	31306500	-1
								chr13	40926500	40927000	-1
								chr13	41053500	41054000	-1
								chr13	53416500	53417000	-1
								chr13	101302500	101303000	-1
								chr13	109779500	109780000	-1
								chr13	112554500	112555000	-1
								chr13	112630500	112631000	-1
								chr13	112785000	112785500	-1
								chr13	114123000	114123500	-1
								chr14	69157500	69158000	-1
								chr14	73146500	73147000	-1
								chr14	74670500	74671000	-1
								chr14	75704000	75704500	-1
								chr14	76600500	76601000	-1
								chr14	77179500	77180000	-1
								chr14	91825500	91826000	-1
								chr14	93425500	93426000	-1
								chr14	95538000	95538500	-1
								chr14	97129000	97129500	-1
								chr14	99506500	99507000	-1
								chr14	100001000	100002000	-1
								chr14	101967500	101968000	-1
								chr14	102053500	102054500	-1
								chr14	104625000	104626000	-1
								chr14	104666500	104667000	-1
								chr15	25963000	25963500	-1
								chr15	25987000	25987500	-1
								chr15	28235500	28236000	-1
								chr15	29363500	29364000	-1
								chr15	37307000	37307500	-1
								chr15	41210500	41211500	-1
								chr15	53681500	53682000	-1
								chr15	62099500	62100000	-1
								chr15	65629500	65630000	-1
								chr15	66434500	66435000	-1
								chr15	67199500	67200000	-1
								chr15	69957000	69957500	-1
								chr15	70178000	70178500	-1
								chr15	70233500	70234000	-1
								chr15	70561500	70562000	-1
								chr15	77980500	77981000	-1
								chr15	79482500	79483000	-1
								chr15	82042000	82042500	-1
								chr15	93587500	93588000	-1
								chr15	96038500	96039000	-1
								chr16	111000	112000	-1
								chr16	767500	768000	-1
								chr16	893000	893500	-1
								chr16	1033500	1034500	-1
								chr16	1731000	1731500	-1
								chr16	8808500	8809000	-1
								chr16	8815000	8815500	-1
								chr16	8862000	8862500	-1
								chr16	11777000	11777500	-1
								chr16	22291500	22292000	-1
								chr16	26042500	26043000	-1
								chr16	27788000	27788500	-1
								chr16	29189000	29189500	-1
								chr16	48143500	48144000	-1
								chr16	49450000	49450500	-1
								chr16	49548500	49549000	-1
								chr16	50503500	50504000	-1
								chr16	50897000	50897500	-1
								chr16	54546000	54547000	-1
								chr16	54896000	54896500	-1
								chr16	55213500	55214000	-1
								chr16	57141000	57141500	-1
								chr16	57149000	57149500	-1
								chr16	58529500	58530000	-1
								chr16	70725500	70726000	-1
								chr16	72459500	72460000	-1
								chr16	72963500	72964000	-1
								chr16	73265500	73266500	-1
								chr16	73417500	73418000	-1
								chr16	78496500	78497000	-1
								chr16	78519500	78520000	-1
								chr16	78601500	78602000	-1
								chr16	78699000	78699500	-1
								chr16	85075000	85075500	-1
								chr16	85317500	85318000	-1
								chr16	85414000	85414500	-1
								chr16	85458000	85458500	-1
								chr16	85465000	85466000	-1
								chr16	85519000	85519500	-1
								chr16	85543500	85544000	-1
								chr16	85572500	85573000	-1
								chr16	85616000	85616500	-1
								chr16	85661500	85662000	-1
								chr16	85686000	85687000	-1
								chr16	85743000	85743500	-1
								chr16	85756000	85756500	-1
								chr16	87108500	87109000	-1
								chr16	87739000	87740000	-1
								chr16	87856000	87856500	-1
								chr16	88482000	88482500	-1
								chr16	88547000	88547500	-1
								chr16	89202500	89203000	-1
								chr16	89205000	89205500	-1
								chr17	981000	982500	-1
								chr17	987000	987500	-1
								chr17	1027500	1028000	-1
								chr17	1072500	1073000	-1
								chr17	1120000	1120500	-1
								chr17	1474500	1475000	-1
								chr17	1541500	1542000	-1
								chr17	1833000	1834500	-1
								chr17	1843000	1843500	-1
								chr17	1845000	1845500	-1
								chr17	3432000	3432500	-1
								chr17	4730500	4731000	-1
								chr17	6063000	6064000	-1
								chr17	7107500	7108000	-1
								chr17	12905500	12906000	-1
								chr17	14683500	14684000	-1
								chr17	17649500	17650000	-1
								chr17	17722000	17722500	-1
								chr17	18012000	18012500	-1
								chr17	19315000	19315500	-1
								chr17	27416500	27417000	-1
								chr17	33179000	33179500	-1
								chr17	40836500	40837500	-1
								chr17	40838500	40840000	-1
								chr17	43902500	43903000	-1
								chr17	48686500	48687000	-1
								chr17	55623000	55623500	-1
								chr17	70375000	70375500	-1
								chr17	71353000	71353500	-1
								chr17	71512500	71513000	-1
								chr17	71533000	71533500	-1
								chr17	71844000	71844500	-1
								chr17	73630500	73631000	-1
								chr17	75789000	75789500	-1
								chr17	76454500	76455500	-1
								chr17	77084500	77085000	-1
								chr17	77652000	77652500	-1
								chr17	77922500	77923000	-1
								chr17	77951500	77952000	-1
								chr17	77955000	77956000	-1
								chr17	78079500	78080000	-1
								chr17	78413000	78413500	-1
								chr17	78419000	78420000	-1
								chr17	78747500	78748000	-1
								chr17	78774500	78775000	-1
								chr17	78813500	78814000	-1
								chr17	78846000	78846500	-1
								chr17	78915500	78916000	-1
								chr17	79027000	79027500	-1
								chr17	79405000	79405500	-1
								chr17	79973500	79974000	-1
								chr17	80622500	80623000	-1
								chr17	80995500	80996000	-1
								chr18	8800000	8800500	-1
								chr18	8912500	8913000	-1
								chr18	13135500	13136000	-1
								chr18	13453500	13454000	-1
								chr18	46385500	46386500	-1
								chr18	47091500	47092000	-1
								chr18	72079500	72080000	-1
								chr18	73719500	73720000	-1
								chr18	76322500	76323000	-1
								chr18	76463000	76463500	-1
								chr18	76589000	76589500	-1
								chr18	76761000	76761500	-1
								chr18	77509500	77510000	-1
								chr19	898500	899000	-1
								chr19	1302500	1303000	-1
								chr19	1819500	1820000	-1
								chr19	2337000	2337500	-1
								chr19	5051000	5051500	-1
								chr19	5074500	5075000	-1
								chr19	5078500	5079000	-1
								chr19	5080500	5081000	-1
								chr19	5179500	5180000	-1
								chr19	5191500	5192000	-1
								chr19	5334500	5335000	-1
								chr19	6228000	6229000	-1
								chr19	10838500	10839000	-1
								chr19	11352500	11353000	-1
								chr19	12707500	12708500	-1
								chr19	18459000	18459500	-1
								chr19	29927500	29928000	-1
								chr19	30551000	30551500	-1
								chr19	30801500	30802000	-1
								chr19	31912500	31913000	-1
								chr19	38993500	38994000	-1
								chr19	42675500	42676000	-1
								chr19	45640500	45641000	-1
								chr19	47894000	47894500	-1
								chr19	58861500	58862000	-1
								chr2	2030000	2030500	-1
								chr2	3292500	3293000	-1
								chr2	6125500	6126000	-1
								chr2	6221000	6221500	-1
								chr2	10344500	10345500	-1
								chr2	10484000	10484500	-1
								chr2	10567000	10568000	-1
								chr2	11636000	11636500	-1
								chr2	11939000	11939500	-1
								chr2	16350000	16350500	-1
								chr2	16608500	16609000	-1
								chr2	47254000	47254500	-1
								chr2	58784000	58784500	-1
								chr2	60591500	60592000	-1
								chr2	100497000	100497500	-1
								chr2	100967000	100967500	-1
								chr2	103130000	103130500	-1
								chr2	103792500	103793500	-1
								chr2	104643000	104643500	-1
								chr2	109901500	109902000	-1
								chr2	114880500	114881000	-1
								chr2	119028000	119028500	-1
								chr2	121116500	121117000	-1
								chr2	121261000	121261500	-1
								chr2	121532500	121533000	-1
								chr2	121554500	121555000	-1
								chr2	121555500	121556000	-1
								chr2	121632000	121632500	-1
								chr2	121668000	121668500	-1
								chr2	121684500	121685000	-1
								chr2	121836500	121837000	-1
								chr2	127536500	127537000	-1
								chr2	128403000	128403500	-1
								chr2	130092000	130092500	-1
								chr2	131583000	131583500	-1
								chr2	133343500	133344000	-1
								chr2	160081500	160082000	-1
								chr2	177430500	177431000	-1
								chr2	206594500	206595000	-1
								chr2	233361500	233362500	-1
								chr2	233384000	233384500	-1
								chr2	236486500	236487000	-1
								chr2	236539000	236539500	-1
								chr2	236619000	236619500	-1
								chr2	236773500	236774000	-1
								chr2	236826000	236826500	-1
								chr2	236867500	236868000	-1
								chr2	237497000	237497500	-1
								chr2	240112000	240112500	-1
								chr2	240117000	240117500	-1
								chr2	240394000	240394500	-1
								chr2	241235500	241236000	-1
								chr2	242606000	242606500	-1
								chr20	688000	688500	-1
								chr20	1956000	1956500	-1
								chr20	20213500	20214000	-1
								chr20	20394500	20395000	-1
								chr20	20869000	20869500	-1
								chr20	20973500	20974500	-1
								chr20	31129000	31129500	-1
								chr20	31151500	31152000	-1
								chr20	34767500	34768000	-1
								chr20	34997000	34997500	-1
								chr20	46828000	46828500	-1
								chr20	48067000	48067500	-1
								chr20	55533000	55533500	-1
								chr20	57294000	57294500	-1
								chr20	59863500	59864000	-1
								chr20	60132500	60133000	-1
								chr20	60144500	60145000	-1
								chr20	60214000	60214500	-1
								chr20	60304000	60304500	-1
								chr20	60309000	60309500	-1
								chr20	60361000	60362000	-1
								chr20	60638000	60639000	-1
								chr20	60811500	60812000	-1
								chr20	60868500	60869000	-1
								chr20	61405500	61406000	-1
								chr20	61417500	61418000	-1
								chr20	62002500	62003000	-1
								chr20	62828000	62828500	-1
								chr21	37919500	37920000	-1
								chr21	44601500	44602000	-1
								chr21	44790000	44790500	-1
								chr21	46833000	46833500	-1
								chr21	47814000	47814500	-1
								chr22	19830500	19831000	-1
								chr22	20222500	20223000	-1
								chr22	27177500	27178000	-1
								chr22	27486500	27487000	-1
								chr22	28169000	28169500	-1
								chr22	28410000	28410500	-1
								chr22	35847000	35848000	-1
								chr22	42348000	42348500	-1
								chr22	42727000	42727500	-1
								chr22	42734000	42735000	-1
								chr22	44549500	44550000	-1
								chr22	44642000	44642500	-1
								chr22	44778000	44778500	-1
								chr22	46301500	46302000	-1
								chr22	46775500	46776000	-1
								chr22	46834000	46834500	-1
								chr22	46856500	46857000	-1
								chr22	46881000	46882000	-1
								chr22	47463000	47463500	-1
								chr22	49203000	49203500	-1
								chr22	49220500	49221000	-1
								chr22	49654500	49655000	-1
								chr3	10546000	10546500	-1
								chr3	13083500	13085000	-1
								chr3	13088000	13088500	-1
								chr3	13093500	13094000	-1
								chr3	13853000	13853500	-1
								chr3	16371000	16371500	-1
								chr3	40657500	40658000	-1
								chr3	47577500	47578500	-1
								chr3	49035500	49036000	-1
								chr3	50508000	50508500	-1
								chr3	52345500	52346000	-1
								chr3	62573000	62573500	-1
								chr3	70280000	70281000	-1
								chr3	71410500	71411000	-1
								chr3	111431000	111431500	-1
								chr3	114567000	114567500	-1
								chr3	115412500	115413000	-1
								chr3	122829000	122830000	-1
								chr3	125413500	125414000	-1
								chr3	127386500	127387000	-1
								chr3	128296500	128297000	-1
								chr3	129274000	129274500	-1
								chr3	137228000	137228500	-1
								chr3	137571000	137571500	-1
								chr3	186174500	186175000	-1
								chr3	193455000	193455500	-1
								chr3	193490000	193490500	-1
								chr3	193678500	193679000	-1
								chr4	1376000	1376500	-1
								chr4	1578000	1578500	-1
								chr4	1579000	1579500	-1
								chr4	3278500	3279000	-1
								chr4	3408500	3409000	-1
								chr4	3479500	3480000	-1
								chr4	3752500	3753000	-1
								chr4	6659500	6660000	-1
								chr4	7246000	7246500	-1
								chr4	7304500	7305000	-1
								chr4	7593000	7594000	-1
								chr4	8742000	8742500	-1
								chr4	8746500	8747000	-1
								chr4	17689000	17689500	-1
								chr4	26492000	26492500	-1
								chr5	346000	346500	-1
								chr5	1552000	1552500	-1
								chr5	1834500	1835000	-1
								chr5	2112000	2113000	-1
								chr5	2206000	2206500	-1
								chr5	2515000	2516000	-1
								chr5	2537500	2538000	-1
								chr5	3182000	3182500	-1
								chr5	3393500	3394500	-1
								chr5	3854500	3855000	-1
								chr5	4207500	4208000	-1
								chr5	4230500	4231500	-1
								chr5	6059000	6059500	-1
								chr5	6728000	6728500	-1
								chr5	9197000	9197500	-1
								chr5	10650000	10650500	-1
								chr5	14339500	14340000	-1
								chr5	36662500	36663000	-1
								chr5	132738500	132739000	-1
								chr5	139124000	139124500	-1
								chr5	168246000	168246500	-1
								chr5	168271500	168272000	-1
								chr5	168296500	168297000	-1
								chr5	170349000	170349500	-1
								chr5	171284500	171285000	-1
								chr5	172366500	172367000	-1
								chr5	179401000	179401500	-1
								chr5	179567000	179567500	-1
								chr5	179569000	179570000	-1
								chr5	180646000	180647000	-1
								chr6	3284500	3285500	-1
								chr6	17032000	17032500	-1
								chr6	29723000	29723500	-1
								chr6	35026000	35026500	-1
								chr6	37648500	37649000	-1
								chr6	38029000	38029500	-1
								chr6	41561000	41561500	-1
								chr6	90276500	90277000	-1
								chr6	112007500	112008000	-1
								chr6	112021500	112022000	-1
								chr6	133254000	133254500	-1
								chr6	156919500	156920000	-1
								chr6	157546000	157546500	-1
								chr6	157550000	157550500	-1
								chr6	159190000	159190500	-1
								chr6	159191000	159191500	-1
								chr6	161780000	161780500	-1
								chr6	167128500	167129000	-1
								chr6	170449000	170449500	-1
								chr6	170574500	170575000	-1
								chr6	170754500	170755000	-1
								chr7	563000	563500	-1
								chr7	596000	596500	-1
								chr7	821000	821500	-1
								chr7	1094000	1094500	-1
								chr7	1315500	1316000	-1
								chr7	1370500	1371000	-1
								chr7	1905000	1905500	-1
								chr7	2109000	2109500	-1
								chr7	2147500	2149000	-1
								chr7	2242500	2243000	-1
								chr7	2644000	2644500	-1
								chr7	2656000	2656500	-1
								chr7	2775500	2776000	-1
								chr7	4229500	4230500	-1
								chr7	4243500	4244000	-1
								chr7	16768500	16769000	-1
								chr7	20444000	20444500	-1
								chr7	31068000	31068500	-1
								chr7	44307500	44308000	-1
								chr7	44316500	44317000	-1
								chr7	51301000	51301500	-1
								chr7	69882000	69882500	-1
								chr7	69897500	69898000	-1
								chr7	70096000	70096500	-1
								chr7	73858500	73859000	-1
								chr7	90831000	90831500	-1
								chr7	101333000	101333500	-1
								chr7	101723000	101724000	-1
								chr7	101813500	101814000	-1
								chr7	101858500	101859000	-1
								chr7	101864000	101864500	-1
								chr7	129937500	129938000	-1
								chr7	131422500	131423000	-1
								chr7	139657500	139658000	-1
								chr7	150833500	150834000	-1
								chr7	154035500	154036500	-1
								chr7	156712000	156712500	-1
								chr7	157319500	157320000	-1
								chr7	157810500	157811000	-1
								chr7	157818500	157819000	-1
								chr7	158032000	158032500	-1
								chr8	1080500	1081000	-1
								chr8	1404500	1405000	-1
								chr8	1865500	1866000	-1
								chr8	4520000	4520500	-1
								chr8	8182000	8183000	-1
								chr8	22599500	22600000	-1
								chr8	22642000	22642500	-1
								chr8	26346000	26346500	-1
								chr8	26481000	26481500	-1
								chr8	27494500	27495000	-1
								chr8	37672500	37673000	-1
								chr8	38175500	38176000	-1
								chr8	61325500	61326000	-1
								chr8	67425500	67426000	-1
								chr8	80783500	80784000	-1
								chr8	96186500	96187000	-1
								chr8	123810000	123810500	-1
								chr8	125636500	125637500	-1
								chr8	139613500	139614000	-1
								chr8	141248500	141249000	-1
								chr8	142194500	142195000	-1
								chr8	142981000	142982000	-1
								chr8	143086000	143086500	-1
								chr8	144552500	144553000	-1
								chr8	144561500	144562000	-1
								chr8	144585000	144585500	-1
								chr9	13744500	13745000	-1
								chr9	15146500	15147000	-1
								chr9	19032500	19033000	-1
								chr9	34555000	34555500	-1
								chr9	37924000	37924500	-1
								chr9	37927500	37928000	-1
								chr9	89192000	89193500	-1
								chr9	98368500	98369000	-1
								chr9	100317500	100318000	-1
								chr9	119097000	119097500	-1
								chr9	124370000	124370500	-1
								chr9	124625000	124625500	-1
								chr9	126150000	126150500	-1
								chr9	126235500	126236000	-1
								chr9	127066000	127066500	-1
								chr9	127095000	127095500	-1
								chr9	127112000	127113000	-1
								chr9	127125500	127126000	-1
								chr9	132156500	132157000	-1
								chr9	132267500	132268000	-1
								chr9	132881500	132882000	-1
								chr9	133354000	133355000	-1
								chr9	133357000	133357500	-1
								chr9	133766500	133767000	-1
								chr9	134134000	134134500	-1
								chr9	135432000	135432500	-1
								chr9	135709000	135709500	-1
								chr9	136726000	136726500	-1
								chr9	136753500	136754500	-1
								chr9	137143500	137144000	-1
								chr9	137173000	137173500	-1
								chr9	137223000	137223500	-1
								chr9	137312000	137312500	-1
								chr9	137329000	137329500	-1
								chr9	138949500	138950000	-1
								chr9	139414500	139415000	-1
								chr9	139426000	139426500	-1
								chr9	139436000	139437500	-1
								chr9	140265000	140266000	-1
